# Supplementary material
Source: MDPI journal article supplement (https://www.mdpi.com/2304-6740/7/2/21)

# checkCIF/PLATON report

Structure factors have been supplied for datablock(s) adnh2

THIS REPORT IS FOR GUIDANCE ONLY. IF USED AS PART OF A REVIEW PROCEDURE FOR PUBLICATION, IT SHOULD NOT REPLACE THE EXPERTISE OF AN EXPERIENCED CRYSTALLOGRAPHIC REFEREE.

No syntax errors found.      CIF dictionary      Interpreting this report

## Datablock: adnh2

---

Bond precision:    C-C = 0.0113 A                      Wavelength=0.71073

Cell:                      a=8.5681(2)              b=39.1432(9)              c=15.1808(3)  
                            alpha=90              beta=95.922(1)              gamma=90

Temperature:              293 K

|                | Calculated                           | Reported          |
|----------------|--------------------------------------|-------------------|
| Volume         | 5064.21(19)                          | 5064.21(19)       |
| Space group    | P 21/n                               | P 21/n            |
| Hall group     | -P 2yn                               | -P 2yn            |
| Moiety formula | C21 H32 B3 Ru2 S2, C21 H37 B3 Ru2 S2 | ?                 |
| Sum formula    | C42 H69 B6 Ru4 S4                    | C21 H37 B3 Ru2 S2 |
| Mr             | 1171.35                              | 588.19            |
| Dx,g cm-3      | 1.536                                | 1.543             |
| Z              | 4                                    | 8                 |
| Mu (mm-1)      | 1.363                                | 1.363             |
| F000           | 2364.0                               | 2384.0            |
| F000'          | 2346.22                              |                   |
| h,k,lmax       | 10,46,17                             | 10,46,17          |
| Nref           | 8646                                 | 8596              |
| Tmin,Tmax      | 0.849,0.873                          | 0.651,0.910       |
| Tmin'          | 0.761                                |                   |

Correction method= # Reported T Limits: Tmin=0.651 Tmax=0.910  
AbsCorr = MULTI-SCAN

Data completeness= 0.994                      Theta(max)= 24.737

R(reflections)= 0.0420( 5982)              wR2(reflections)= 0.1018( 8596)

S = 1.016                      Npar= 580

---

The following ALERTS were generated. Each ALERT has the format

**test-name\_ALERT\_alert-type\_alert-level.**

Click on the hyperlinks for more details of the test.

## Alert level C

THETM01\_ALERT\_3\_C The value of  $\sin(\theta_{\max})/\lambda$  is less than 0.590  
 Calculated  $\sin(\theta_{\max})/\lambda = 0.5888$

|                   |                                                  |              |
|-------------------|--------------------------------------------------|--------------|
| PLAT018_ALERT_1_C | _diffn_measured_fraction_theta_max .NE. *_full   | ! Check      |
| PLAT041_ALERT_1_C | Calc. and Reported SumFormula Strings Differ     | Please Check |
| PLAT043_ALERT_1_C | Calculated and Reported Mol. Weight Differ by .. | 5.03 Check   |
| PLAT068_ALERT_1_C | Reported F000 Differs from Calcd (or Missing)... | Please Check |
| PLAT213_ALERT_2_C | Atom C36 has ADP max/min Ratio .....             | 3.1 prolat   |
| PLAT213_ALERT_2_C | Atom C37 has ADP max/min Ratio .....             | 3.2 prolat   |
| PLAT213_ALERT_2_C | Atom C42 has ADP max/min Ratio .....             | 3.7 prolat   |
| PLAT213_ALERT_2_C | Atom C7 has ADP max/min Ratio .....              | 3.5 prolat   |
| PLAT220_ALERT_2_C | Non-Solvent Resd 1 C Ueq(max)/Ueq(min) Range     | 4.6 Ratio    |
| PLAT220_ALERT_2_C | Non-Solvent Resd 2 C Ueq(max)/Ueq(min) Range     | 3.9 Ratio    |
| PLAT222_ALERT_3_C | Non-Solv. Resd 1 H Uiso(max)/Uiso(min) Range     | 4.1 Ratio    |
| PLAT222_ALERT_3_C | Non-Solv. Resd 2 H Uiso(max)/Uiso(min) Range     | 6.0 Ratio    |
| PLAT234_ALERT_4_C | Large Hirshfeld Difference Ru3 --B5 .            | 0.16 Ang.    |
| PLAT234_ALERT_4_C | Large Hirshfeld Difference C33 --C37 .           | 0.17 Ang.    |
| PLAT234_ALERT_4_C | Large Hirshfeld Difference C35 --C36 .           | 0.17 Ang.    |
| PLAT234_ALERT_4_C | Large Hirshfeld Difference C37 --C38 .           | 0.20 Ang.    |
| PLAT241_ALERT_2_C | High 'MainMol' Ueq as Compared to Neighbors of   | S2 Check     |
| PLAT242_ALERT_2_C | Low 'MainMol' Ueq as Compared to Neighbors of    | Ru3 Check    |
| PLAT242_ALERT_2_C | Low 'MainMol' Ueq as Compared to Neighbors of    | Ru4 Check    |
| PLAT242_ALERT_2_C | Low 'MainMol' Ueq as Compared to Neighbors of    | C25 Check    |
| PLAT242_ALERT_2_C | Low 'MainMol' Ueq as Compared to Neighbors of    | C26 Check    |
| PLAT242_ALERT_2_C | Low 'MainMol' Ueq as Compared to Neighbors of    | C33 Check    |
| PLAT242_ALERT_2_C | Low 'MainMol' Ueq as Compared to Neighbors of    | C34 Check    |
| PLAT242_ALERT_2_C | Low 'MainMol' Ueq as Compared to Neighbors of    | C35 Check    |
| PLAT242_ALERT_2_C | Low 'MainMol' Ueq as Compared to Neighbors of    | C36 Check    |
| PLAT242_ALERT_2_C | Low 'MainMol' Ueq as Compared to Neighbors of    | Ru2 Check    |
| PLAT260_ALERT_2_C | Large Average Ueq of Residue Including RU3       | 0.110 Check  |
| PLAT303_ALERT_2_C | Full Occupancy Atom H21 with # Connections       | 2.00 Check   |
| PLAT342_ALERT_3_C | Low Bond Precision on C-C Bonds .....            | 0.01132 Ang. |
| PLAT906_ALERT_3_C | Large K Value in the Analysis of Variance .....  | 2.462 Check  |
| PLAT911_ALERT_3_C | Missing FCF Refl Between Thmin & STh/L= 0.589    | 51 Report    |
| PLAT978_ALERT_2_C | Number C-C Bonds with Positive Residual Density. | 0 Info       |

## Alert level G

FORMU01\_ALERT\_2\_G There is a discrepancy between the atom counts in the  
 \_chemical\_formula\_sum and the formula from the \_atom\_site\* data.  
 Atom count from \_chemical\_formula\_sum: C21 H37 B3 Ru2 S2  
 Atom count from the \_atom\_site data: C21 H34.5 B3 Ru2 S2

CELLZ01\_ALERT\_1\_G Difference between formula and atom\_site contents detected.  
 CELLZ01\_ALERT\_1\_G WARNING: H atoms missing from atom site list. Is this intentional?  
 From the CIF: \_cell\_formula\_units\_Z 8  
 From the CIF: \_chemical\_formula\_sum C21 H37 B3 Ru2 S2  
 TEST: Compare cell contents of formula and atom\_site data

| atom | Z*formula | cif sites | diff  |
|------|-----------|-----------|-------|
| C    | 168.00    | 168.00    | 0.00  |
| H    | 296.00    | 276.00    | 20.00 |
| B    | 24.00     | 24.00     | 0.00  |
| Ru   | 16.00     | 16.00     | 0.00  |
| S    | 16.00     | 16.00     | 0.00  |

|                   |                                                  |           |
|-------------------|--------------------------------------------------|-----------|
| PLAT002_ALERT_2_G | Number of Distance or Angle Restraints on AtSite | 12 Note   |
| PLAT003_ALERT_2_G | Number of Uiso or Uij Restrained non-H Atoms ... | 32 Report |

|                   |                                                  |       |        |
|-------------------|--------------------------------------------------|-------|--------|
| PLAT045_ALERT_1_G | Calculated and Reported Z Differ by a Factor ... | 0.50  | Check  |
| PLAT083_ALERT_2_G | SHELXL Second Parameter in WGHT Unusually Large  | 6.09  | Why ?  |
| PLAT176_ALERT_4_G | The CIF-Embedded .res File Contains SADI Records | 4     | Report |
| PLAT186_ALERT_4_G | The CIF-Embedded .res File Contains ISOR Records | 2     | Report |
| PLAT199_ALERT_1_G | Reported _cell_measurement_temperature ..... (K) | 293   | Check  |
| PLAT200_ALERT_1_G | Reported _diffrn_ambient_temperature ..... (K)   | 293   | Check  |
| PLAT301_ALERT_3_G | Main Residue Disorder .....(Resd 1 )             | 21%   | Note   |
| PLAT303_ALERT_2_G | Full Occupancy Atom H2 with # Connections        | 2.00  | Check  |
| PLAT380_ALERT_4_G | Incorrectly? Oriented X(sp2)-Methyl Moiety ..... | C29   | Check  |
| PLAT380_ALERT_4_G | Incorrectly? Oriented X(sp2)-Methyl Moiety ..... | C30   | Check  |
| PLAT380_ALERT_4_G | Incorrectly? Oriented X(sp2)-Methyl Moiety ..... | C31   | Check  |
| PLAT380_ALERT_4_G | Incorrectly? Oriented X(sp2)-Methyl Moiety ..... | C39   | Check  |
| PLAT380_ALERT_4_G | Incorrectly? Oriented X(sp2)-Methyl Moiety ..... | C40   | Check  |
| PLAT380_ALERT_4_G | Incorrectly? Oriented X(sp2)-Methyl Moiety ..... | C41   | Check  |
| PLAT380_ALERT_4_G | Incorrectly? Oriented X(sp2)-Methyl Moiety ..... | C38   | Check  |
| PLAT380_ALERT_4_G | Incorrectly? Oriented X(sp2)-Methyl Moiety ..... | C7    | Check  |
| PLAT380_ALERT_4_G | Incorrectly? Oriented X(sp2)-Methyl Moiety ..... | C8    | Check  |
| PLAT380_ALERT_4_G | Incorrectly? Oriented X(sp2)-Methyl Moiety ..... | C10   | Check  |
| PLAT380_ALERT_4_G | Incorrectly? Oriented X(sp2)-Methyl Moiety ..... | C6    | Check  |
| PLAT380_ALERT_4_G | Incorrectly? Oriented X(sp2)-Methyl Moiety ..... | C18   | Check  |
| PLAT380_ALERT_4_G | Incorrectly? Oriented X(sp2)-Methyl Moiety ..... | C19   | Check  |
| PLAT380_ALERT_4_G | Incorrectly? Oriented X(sp2)-Methyl Moiety ..... | C20   | Check  |
| PLAT380_ALERT_4_G | Incorrectly? Oriented X(sp2)-Methyl Moiety ..... | C16   | Check  |
| PLAT779_ALERT_4_G | Suspect or Irrelevant (Bond) Angle in CIF .... # | 259   | Check  |
|                   | B2 -B1 -H21 1.555 1.555 1.555                    | 39.00 | Deg.   |
| PLAT860_ALERT_3_G | Number of Least-Squares Restraints .....         | 196   | Note   |
| PLAT909_ALERT_3_G | Percentage of I>2sig(I) Data at Theta(Max) Still | 35%   | Note   |

---

0 **ALERT level A** = Most likely a serious problem - resolve or explain  
 0 **ALERT level B** = A potentially serious problem, consider carefully  
 33 **ALERT level C** = Check. Ensure it is not caused by an omission or oversight  
 31 **ALERT level G** = General information/check it is not something unexpected

9 ALERT type 1 CIF construction/syntax error, inconsistent or missing data  
 24 ALERT type 2 Indicator that the structure model may be wrong or deficient  
 9 ALERT type 3 Indicator that the structure quality may be low  
 22 ALERT type 4 Improvement, methodology, query or suggestion  
 0 ALERT type 5 Informative message, check

---

## Validation response form

Please find below a validation response form (VRF) that can be filled in and pasted into your CIF.

```
# start Validation Reply Form
_vrf_THETM01_adnh2
;
PROBLEM: The value of sine(theta_max)/wavelength is less than 0.590
RESPONSE: ...
;
_vrf_PLAT018_adnh2
;
PROBLEM: _diffrn_measured_fraction_theta_max .NE. *_full ! Check
RESPONSE: ...
;
_vrf_PLAT041_adnh2
;
PROBLEM: Calc. and Reported SumFormula Strings Differ Please Check
RESPONSE: ...
;
```

```

_vrf_PLAT043_adnh2
;
PROBLEM: Calculated and Reported Mol. Weight Differ by ..      5.03 Check
RESPONSE: ...
;
_vrf_PLAT068_adnh2
;
PROBLEM: Reported F000 Differs from Calcd (or Missing)...      Please Check
RESPONSE: ...
;
_vrf_PLAT213_adnh2
;
PROBLEM: Atom C36          has ADP max/min Ratio .....      3.1 prolat
RESPONSE: ...
;
_vrf_PLAT220_adnh2
;
PROBLEM: Non-Solvent  Resd 1  C    Ueq(max)/Ueq(min) Range      4.6 Ratio
RESPONSE: ...
;
_vrf_PLAT222_adnh2
;
PROBLEM: Non-Solv.  Resd 1  H    Uiso(max)/Uiso(min) Range      4.1 Ratio
RESPONSE: ...
;
_vrf_PLAT234_adnh2
;
PROBLEM: Large Hirshfeld Difference Ru3      --B5      .      0.16 Ang.
RESPONSE: ...
;
_vrf_PLAT241_adnh2
;
PROBLEM: High      'MainMol' Ueq as Compared to Neighbors of      S2 Check
RESPONSE: ...
;
_vrf_PLAT242_adnh2
;
PROBLEM: Low      'MainMol' Ueq as Compared to Neighbors of      Ru3 Check
RESPONSE: ...
;
_vrf_PLAT260_adnh2
;
PROBLEM: Large Average Ueq of Residue Including      RU3      0.110 Check
RESPONSE: ...
;
_vrf_PLAT303_adnh2
;
PROBLEM: Full Occupancy Atom H21          with # Connections      2.00 Check
RESPONSE: ...
;
_vrf_PLAT342_adnh2
;
PROBLEM: Low Bond Precision on  C-C Bonds .....      0.01132 Ang.
RESPONSE: ...
;
_vrf_PLAT906_adnh2
;
PROBLEM: Large K Value in the Analysis of Variance .....      2.462 Check
RESPONSE: ...
;
_vrf_PLAT911_adnh2
;

```

```
PROBLEM: Missing FCF Refl Between Thmin & STh/L=      0.589      51 Report
RESPONSE: ...
;
_vrf_PLAT978_adnh2
;
PROBLEM: Number C-C Bonds with Positive Residual Density.      0 Info
RESPONSE: ...
;
# end Validation Reply Form
```

---

It is advisable to attempt to resolve as many as possible of the alerts in all categories. Often the minor alerts point to easily fixed oversights, errors and omissions in your CIF or refinement strategy, so attention to these fine details can be worthwhile. In order to resolve some of the more serious problems it may be necessary to carry out additional measurements or structure refinements. However, the purpose of your study may justify the reported deviations and the more serious of these should normally be commented upon in the discussion or experimental section of a paper or in the "special\_details" fields of the CIF. checkCIF was carefully designed to identify outliers and unusual parameters, but every test has its limitations and alerts that are not important in a particular case may appear. Conversely, the absence of alerts does not guarantee there are no aspects of the results needing attention. It is up to the individual to critically assess their own results and, if necessary, seek expert advice.

### **Publication of your CIF in IUCr journals**

A basic structural check has been run on your CIF. These basic checks will be run on all CIFs submitted for publication in IUCr journals (*Acta Crystallographica*, *Journal of Applied Crystallography*, *Journal of Synchrotron Radiation*); however, if you intend to submit to *Acta Crystallographica Section C* or *E* or *IUCrData*, you should make sure that full publication checks are run on the final version of your CIF prior to submission.

### **Publication of your CIF in other journals**

Please refer to the *Notes for Authors* of the relevant journal for any special instructions relating to CIF submission.

---

**PLATON version of 19/10/2018; check.def file version of 15/10/2018**

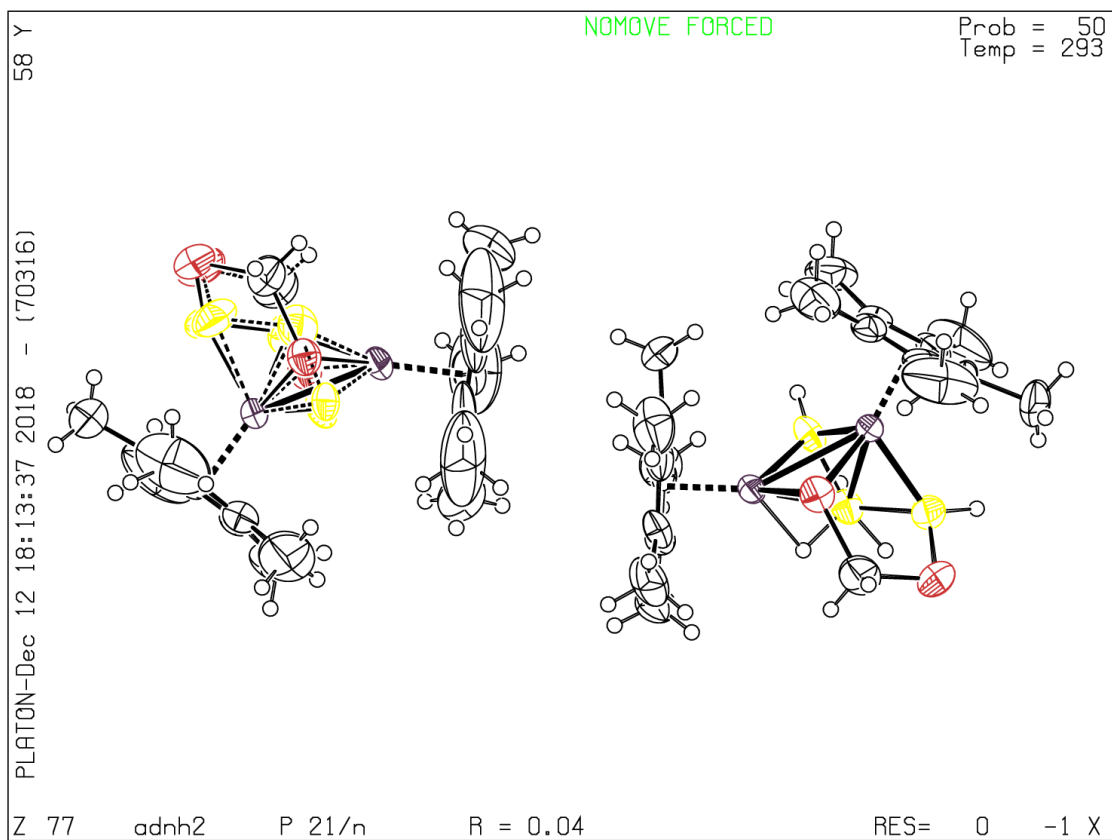

Supplement: s1 [file s1]
