# Supplementary material
Source: MDPI journal article supplement (https://www.mdpi.com/2304-6740/7/2/21)
Supplement: s1 [file s1]

# Supplementary Materials: Synthesis of Trithia-borinane Complexes Stabilized in Diruthenium Core: $[(Cp^*Ru)_2(\eta^1-S)(\eta^1-CS)\{(CH_2)_2S_3 BR\}]$ (R = H or SMe)

Koushik Saha, Urminder Kaur, Rosmita Borthakur and Sundargopal Ghosh \*

## Table of Contents

### I .1 Spectroscopic Details

|             |                                                   |
|-------------|---------------------------------------------------|
| Figure S1.  | ESI(MS) spectrum of compound <b>2</b>             |
| Figure S2.  | HR-MS spectrum of compound <b>2</b>               |
| Figure S3.  | ESI(MS) spectrum of compound <b>3</b>             |
| Figure S4.  | HR-MS spectrum of compound <b>3</b>               |
| Figure S5.  | ESI(MS) spectrum of compound <b>4</b>             |
| Figure S6.  | HR-MS spectrum of compound <b>4</b>               |
| Figure S7.  | ESI(MS) spectrum of compound <b>5</b>             |
| Figure S8.  | HR-MS spectrum of compound <b>5</b>               |
| Figure S9.  | $^1H$ NMR spectrum of compound <b>2</b>           |
| Figure S10. | $^1H\{^{11}B\}$ NMR spectrum of compound <b>2</b> |
| Figure S11. | $^{11}B\{^1H\}$ NMR spectrum of compound <b>2</b> |
| Figure S12. | $^{13}C\{^1H\}$ NMR spectrum of compound <b>2</b> |
| Figure S13. | $^1H$ NMR spectrum of compound <b>3</b>           |
| Figure S14. | $^{11}B\{^1H\}$ NMR spectrum of compound <b>3</b> |
| Figure S15. | $^{13}C\{^1H\}$ NMR spectrum of compound <b>3</b> |
| Figure S16. | $^1H$ NMR spectrum of compound <b>4</b>           |
| Figure S17. | $^{11}B\{^1H\}$ NMR spectrum of compound <b>4</b> |
| Figure S18. | $^{13}C\{^1H\}$ NMR spectrum of compound <b>4</b> |
| Figure S19. | $^1H$ NMR spectrum of compound <b>5</b>           |
| Figure S20. | $^1H\{^{11}B\}$ NMR spectrum of compound <b>5</b> |
| Figure S21. | $^{11}B\{^1H\}$ NMR spectrum of compound <b>5</b> |
| Figure S22. | $^{13}C\{^1H\}$ NMR spectrum of compound <b>5</b> |

## I.1 Spectroscopic Details

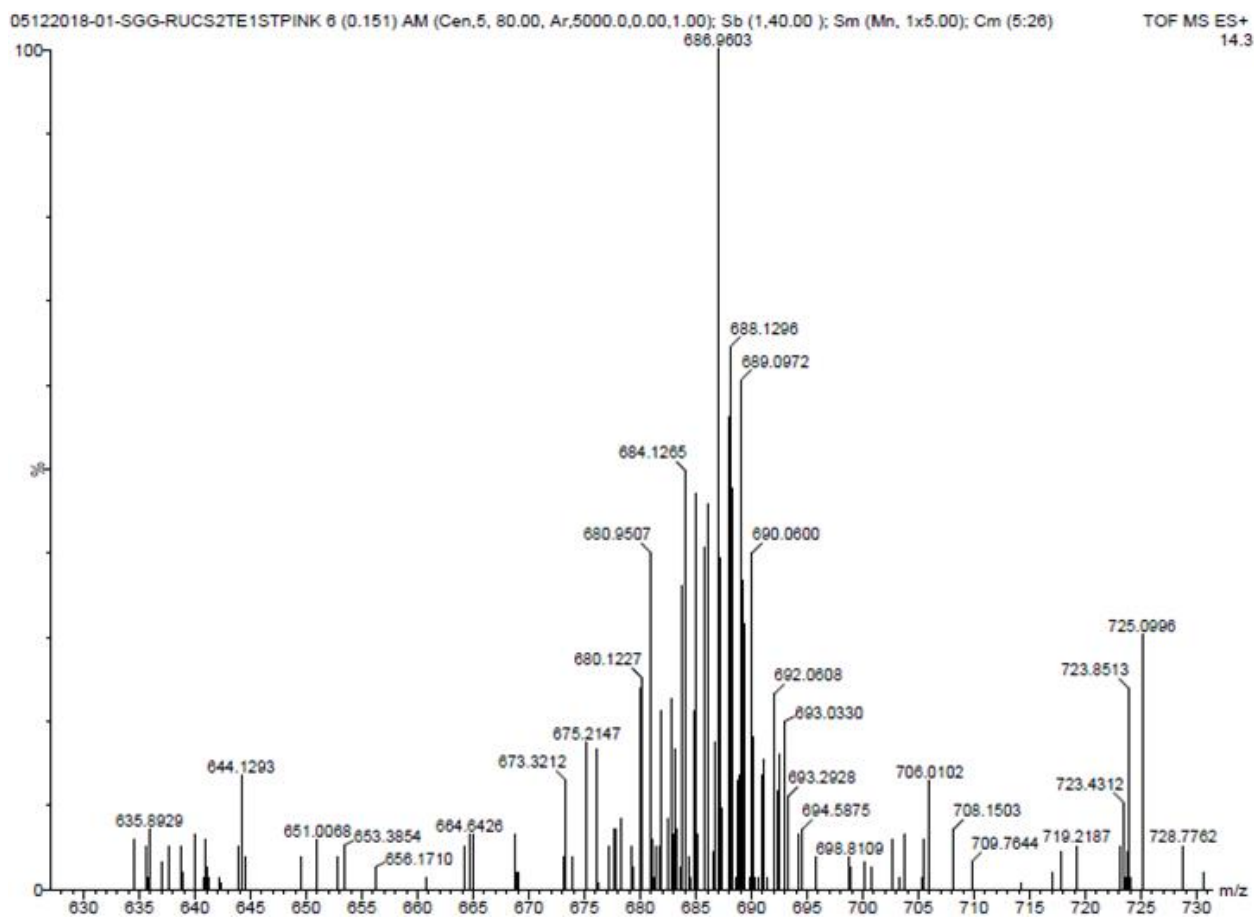

**Figure S1.** ESI(MS) spectrum of compound **2**.

**Single Mass Analysis**

Tolerance = 5.0 mDa / DBE: min = -1.5, max = 50.0

Element prediction: Off

Number of isotope peaks used for i-FIT = 3

Monoisotopic Mass, Odd and Even Electron Ions

35 formula(e) evaluated with 1 results within limits (up to 50 best isotopic matches for each mass)

Elements Used:

C: 0-23 H: 0-38 B: 0-1 S: 0-5 Ru: 0-2

SGG-RUCS2TE1STPINK

05122018-01-SGG-RUCS2TE1STPINK 6 (0.151) AM (Cen,5, 80.00, Ar,5000.0,0.00,1.00); Sb (1,40.00 ); Sm (Mn, 1x5.00); Cm (5:26) TOF MS ES+ 1.43e+001

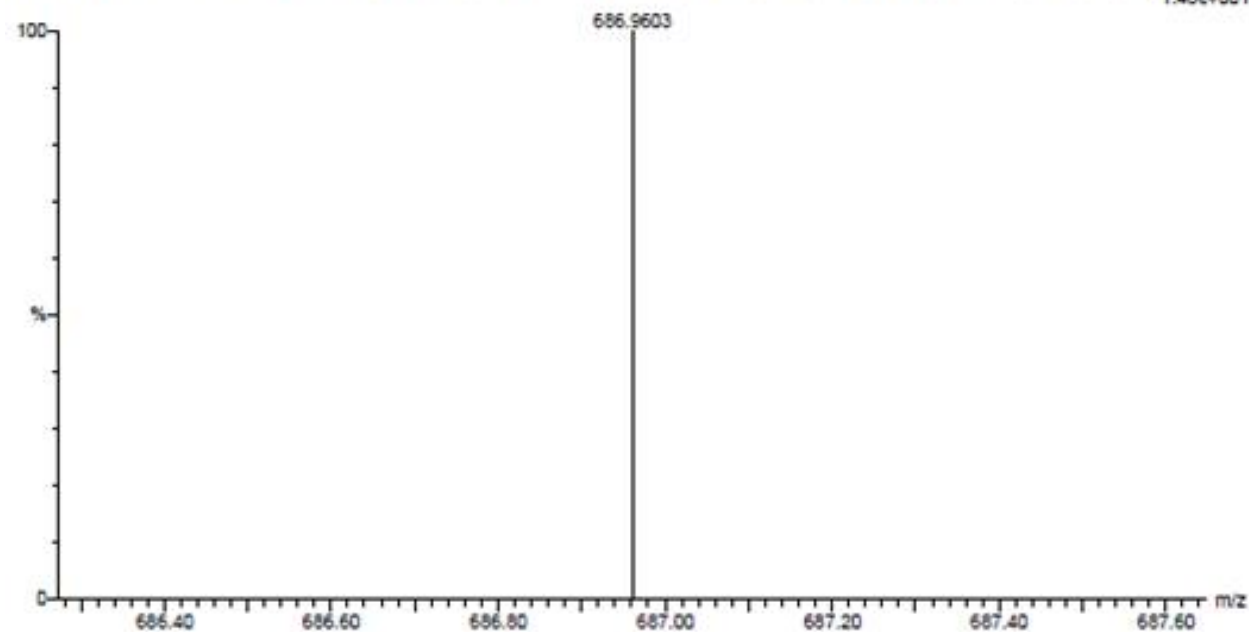

| Minimum: |            |     |      | -1.5 |       |                  |
|----------|------------|-----|------|------|-------|------------------|
| Maximum: |            | 5.0 | 10.0 | 50.0 |       |                  |
| Mass     | Calc. Mass | mDa | PPM  | DBE  | i-FIT | Formula          |
| 686.9603 | 686.9601   | 0.2 | 0.3  | 6.5  | n/a   | C23 H36 B S5 Ru2 |

**Figure S2.** HR-MS spectrum of compound 2.

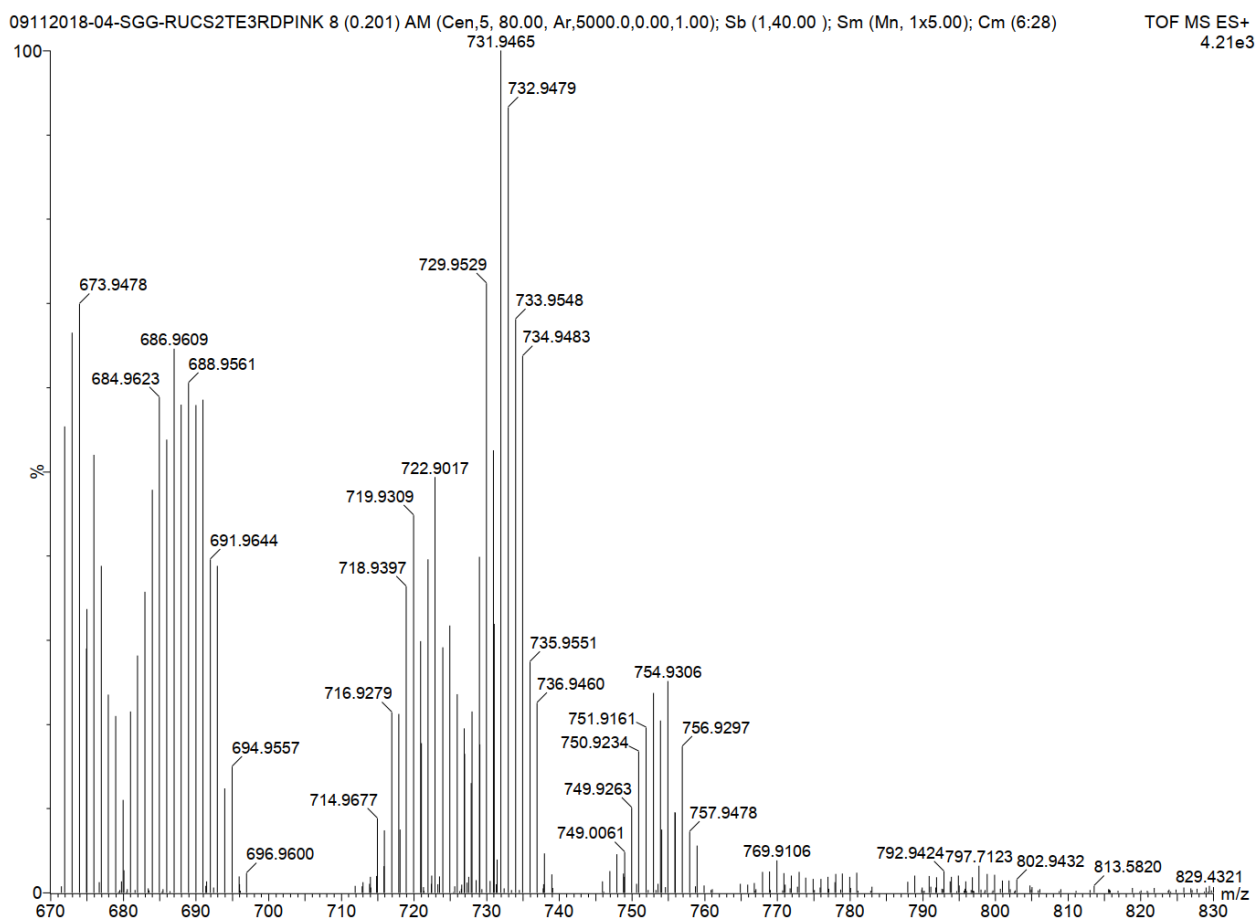

**Figure S3.** ESI(MS) spectrum of compound **3**.

**Single Mass Analysis**

Tolerance = 5.0 mDa / DBE: min = -1.5, max = 50.0

Element prediction: Off

Number of isotope peaks used for i-FIT = 3

Monoisotopic Mass, Odd and Even Electron Ions

41 formula(e) evaluated with 1 results within limits (up to 50 best isotopic matches for each mass)

Elements Used:

C: 0-24 H: 0-38 B: 0-1 S: 0-6 Ru: 0-2

SGG-RUCS2TE3RDPINK

09112018-04-SGG-RUCS2TE3RDPINK 8 (0.201) AM (Cen,5, 80.00, Ar,5000.0,0.00,1.00); Sb (1,40.00 ); Sm (Mn, 1x5.00); Cm (6:28) TOF MS ES+ 3.92e+003

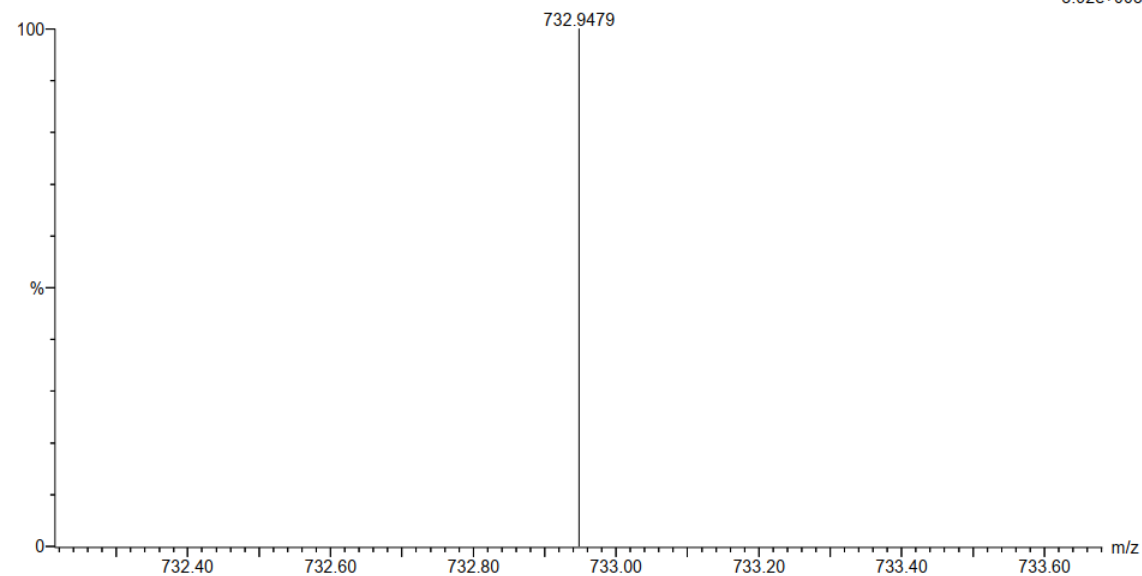

| Minimum: |            |     |      | -1.5 |       |                  |
|----------|------------|-----|------|------|-------|------------------|
| Maximum: |            | 5.0 | 10.0 | 50.0 |       |                  |
| Mass     | Calc. Mass | mDa | PPM  | DBE  | i-FIT | Formula          |
| 732.9479 | 732.9478   | 0.1 | 0.1  | 6.5  | n/a   | C24 H38 B S6 Ru2 |

**Figure S4.** HR-MS spectrum of compound **3**.

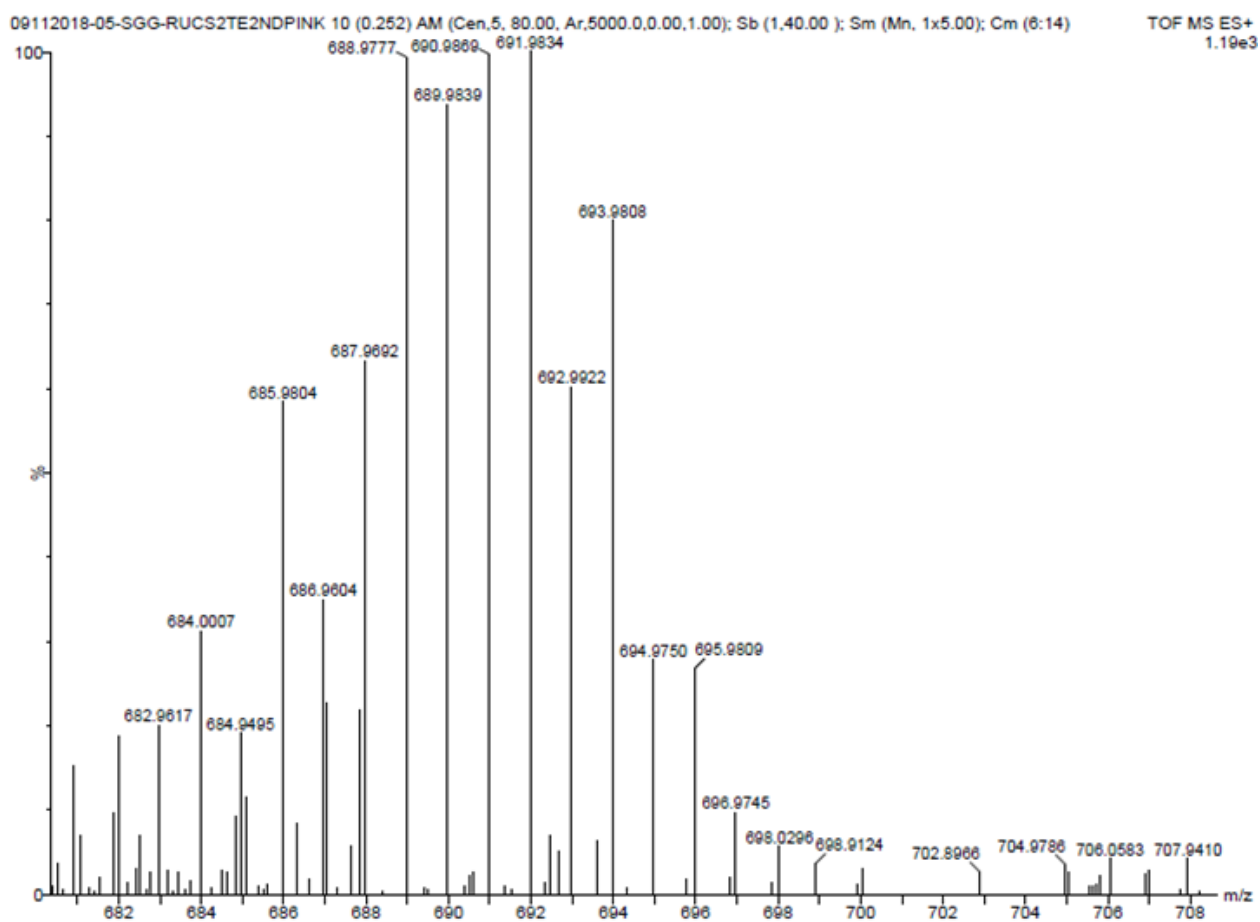

**Figure S5.** ESI(MS) spectrum of compound **4**.

**Single Mass Analysis**

Tolerance = 5.0 mDa / DBE: min = -1.5, max = 50.0

Element prediction: Off

Number of isotope peaks used for i-FIT = 3

Monoisotopic Mass, Odd and Even Electron Ions

35 formula(e) evaluated with 1 results within limits (up to 50 best isotopic matches for each mass)

Elements Used:

C: 0-23 H: 0-36 B: 0-1 S: 0-5 Ru: 0-2

SGG-RUCS2TE2NDPINK

09112018-05-SGG-RUCS2TE2NDPINK 10 (0.252) AM (Cen,5, 80.00, Ar,5000.0,0.00,1.00); Sb (1,40.00 ); Sm (Mn, 1x5.00); Cm (6:14)

4.15e+002

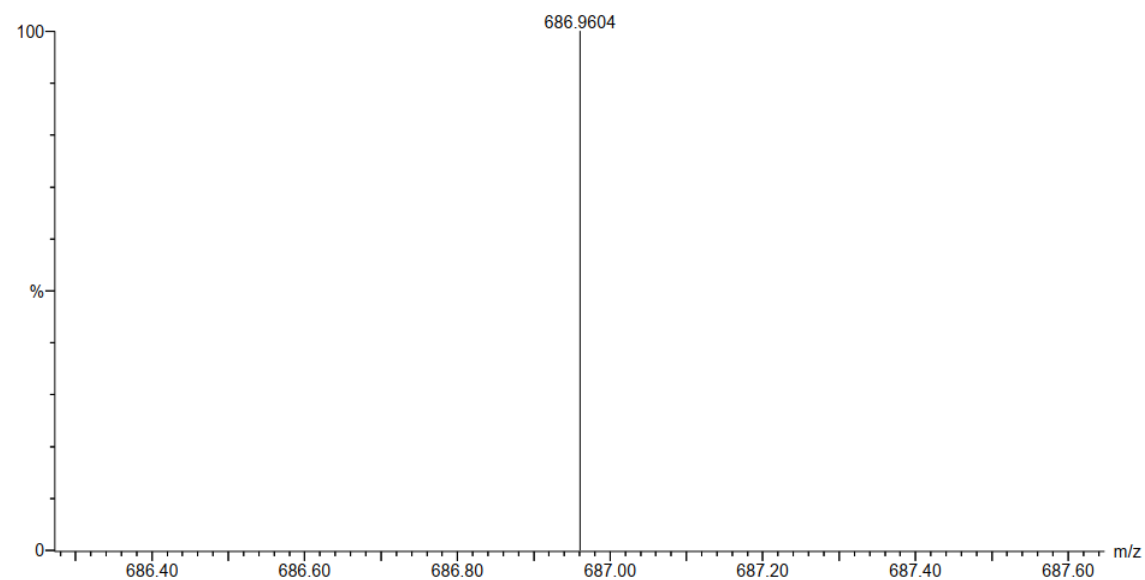

Minimum: -1.5  
Maximum: 5.0 10.0 50.0

| Mass     | Calc. Mass | mDa | PPM | DBE | i-FIT | Formula          |
|----------|------------|-----|-----|-----|-------|------------------|
| 686.9604 | 686.9601   | 0.3 | 0.4 | 6.5 | n/a   | C23 H36 B S5 Ru2 |

**Figure S6.** HR-MS spectrum of compound **4**.

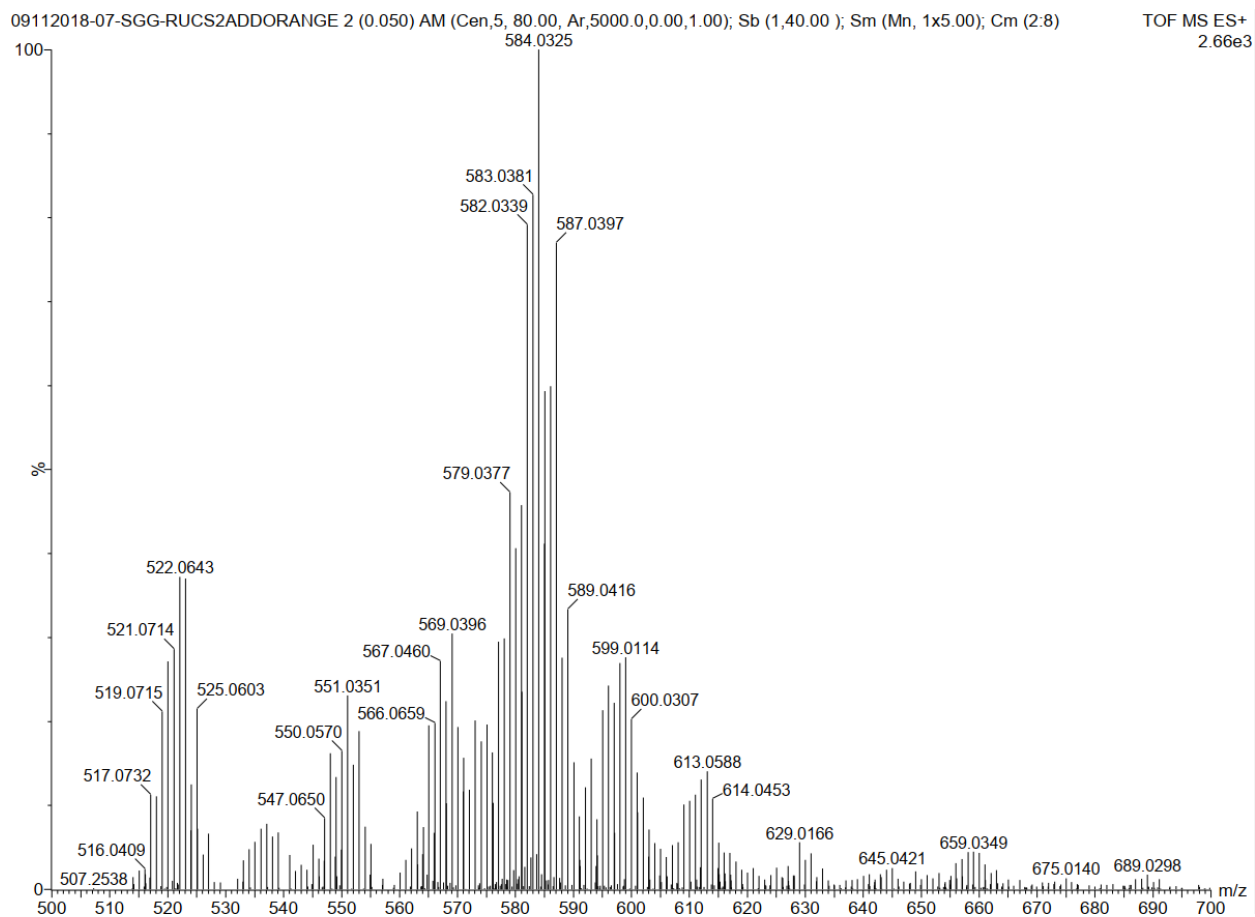

**Figure S7.** ESI(MS) spectrum of compound **5**.



## Elemental Composition Report

Page 1

## Single Mass Analysis

Tolerance = 5.0 mDa / DBE: min = -1.5, max = 50.0

Element prediction: Off

Number of isotope peaks used for i-FIT = 3

Monoisotopic Mass, Odd and Even Electron Ions

71 formula(e) evaluated with 1 results within limits (up to 50 best isotopic matches for each mass)

Elements Used:

C: 0-21 H: 0-37 B: 0-3 Na: 0-1 S: 0-2 Ru: 0-2

SGG-RUCS2ADDORANGE

09112018-07-SGG-RUCS2ADDORANGE 2 (0.050) AM (Cen,5, 80.00, Ar,5000.0,0.00,1.00); Sb (1,40.00 ); Sm (Mn, 1x5.00); Cm (2:8)

3.73e+002

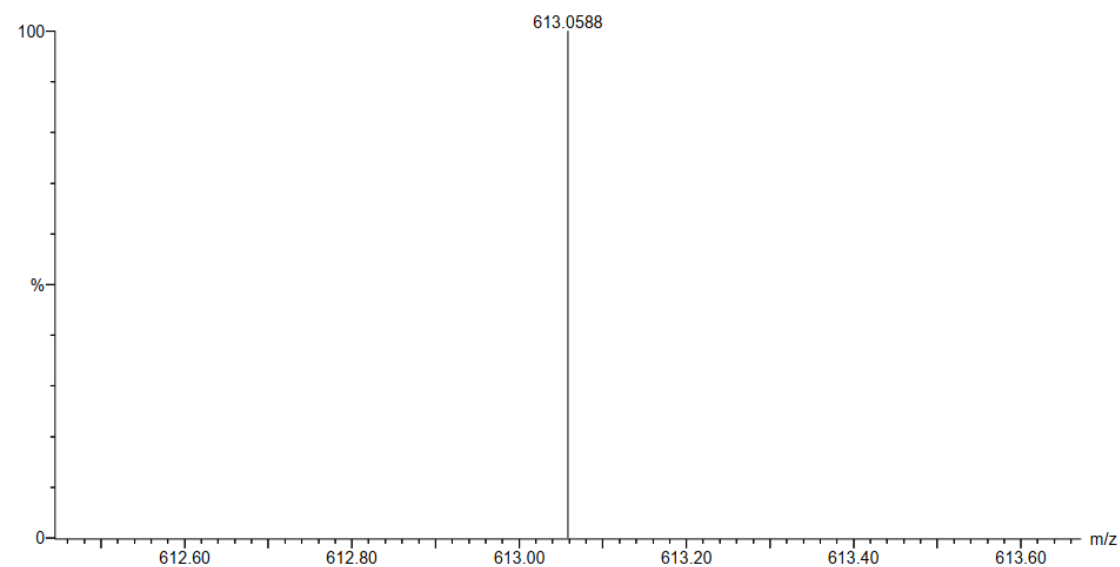

Minimum: -1.5  
 Maximum: 5.0 10.0 50.0

| Mass     | Calc. Mass | mDa  | PPM  | DBE | i-FIT | Formula              |
|----------|------------|------|------|-----|-------|----------------------|
| 613.0588 | 613.0601   | -1.3 | -2.1 | 4.5 | n/a   | C21 H37 B3 Na S2 Ru2 |

Figure S8. HR-MS spectrum of compound 5.

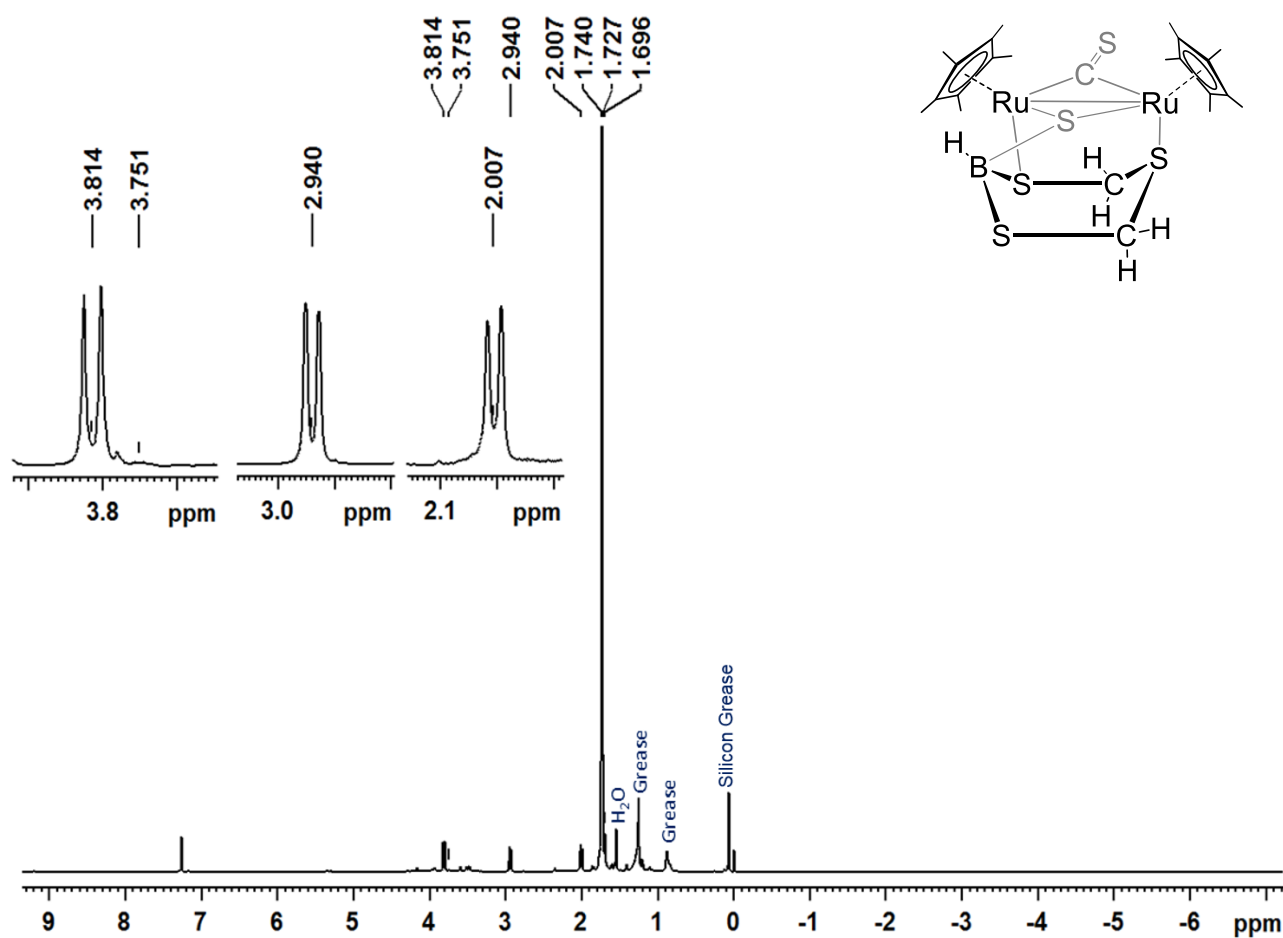

**Figure S9.**  $^1\text{H}$  NMR spectrum of compound **2** in  $\text{CDCl}_3$ .

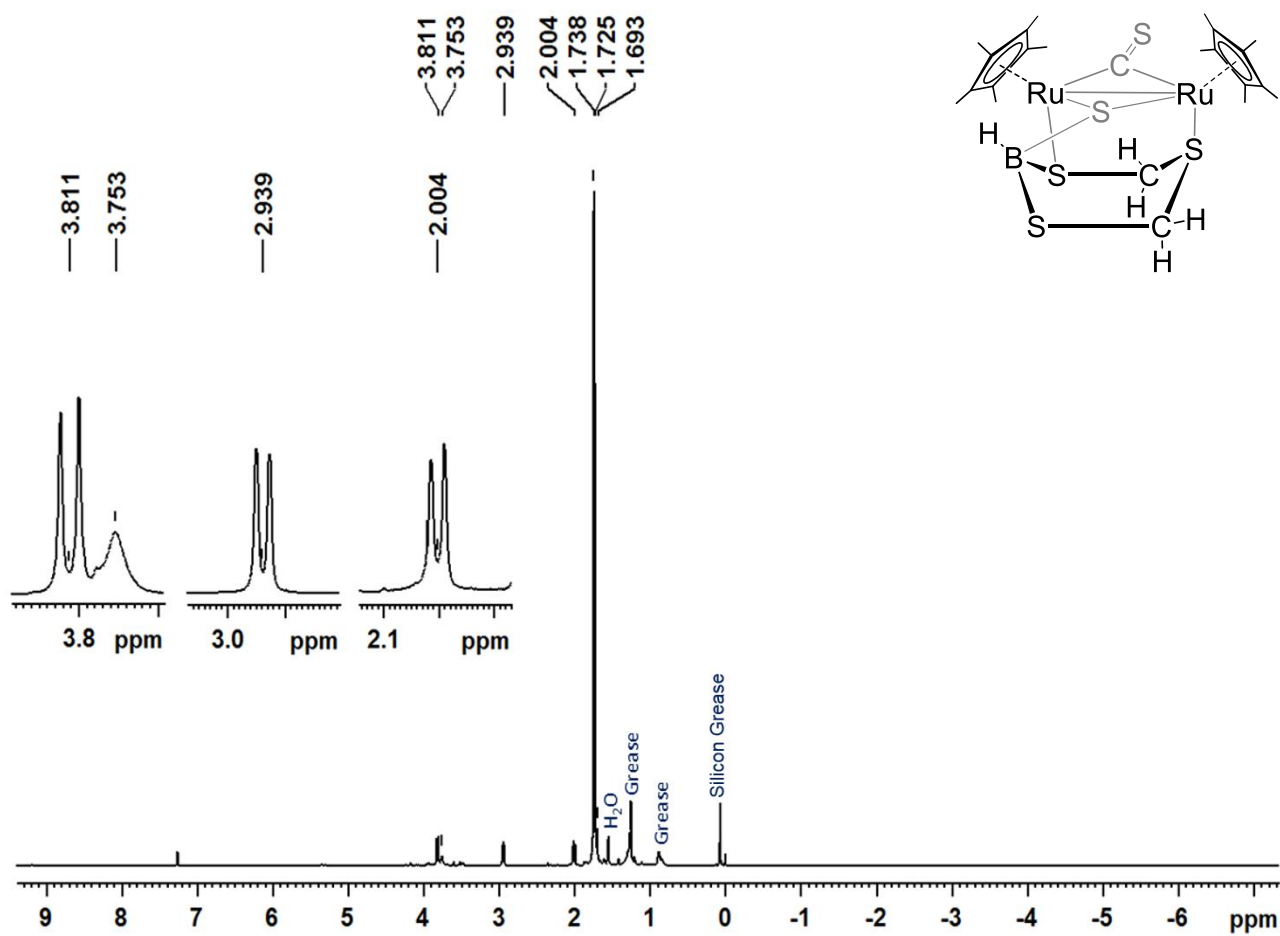

**Figure S10.**  $^1\text{H}\{^{11}\text{B}\}$  NMR spectrum of compound **2** in  $\text{CDCl}_3$ .

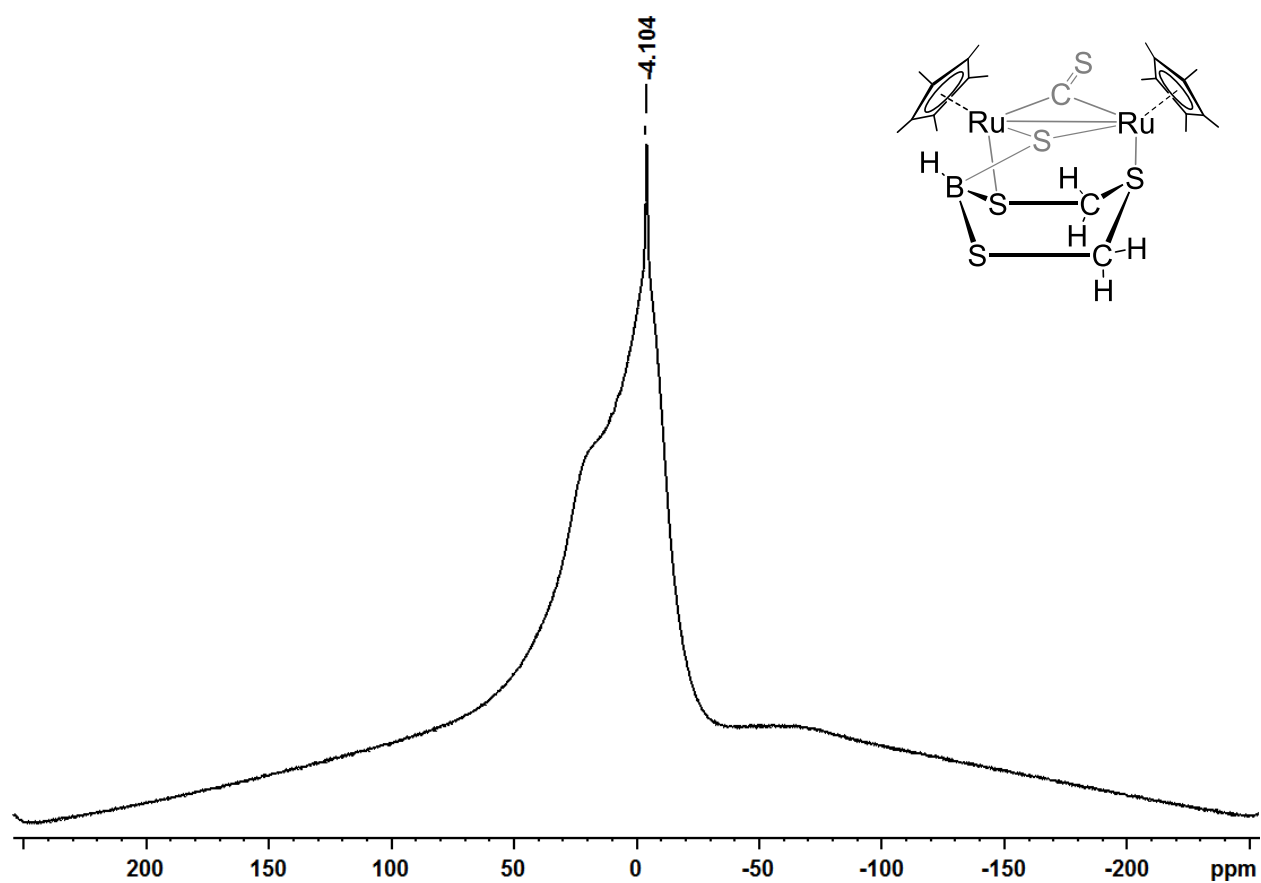

**Figure S11.**  $^{11}\text{B}\{^1\text{H}\}$  NMR spectrum of compound **2** in  $\text{CDCl}_3$ .

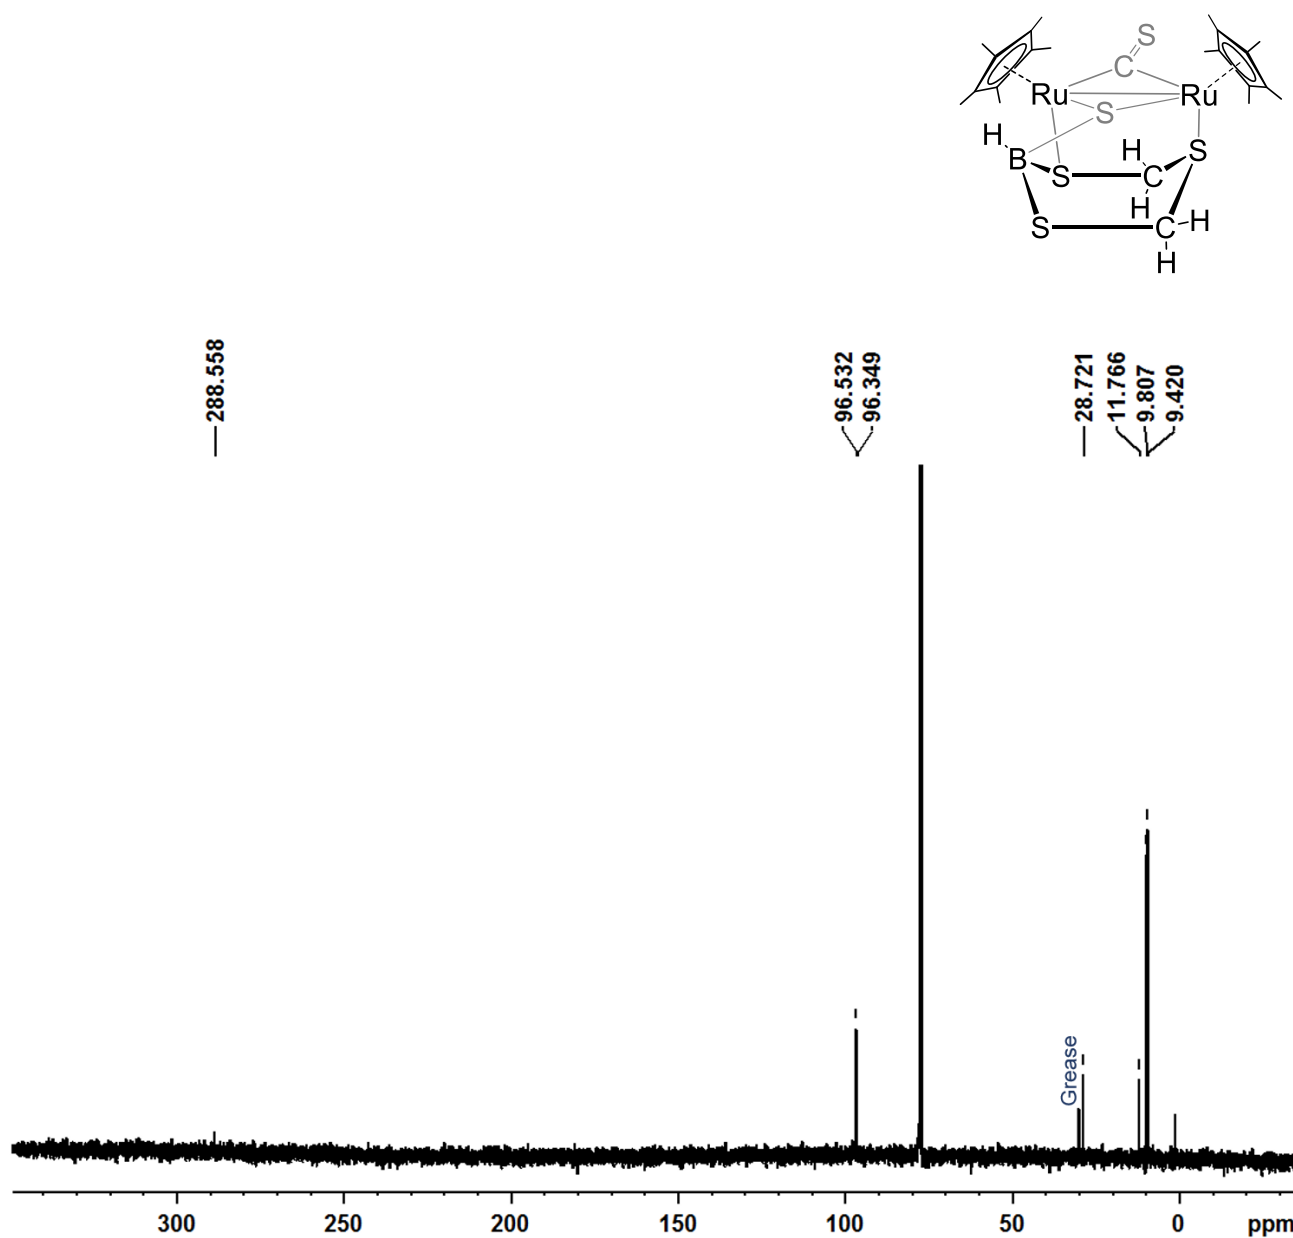

**Figure S12.**  $^{13}\text{C}\{^1\text{H}\}$  NMR spectrum of compound **2** in  $\text{CDCl}_3$ .

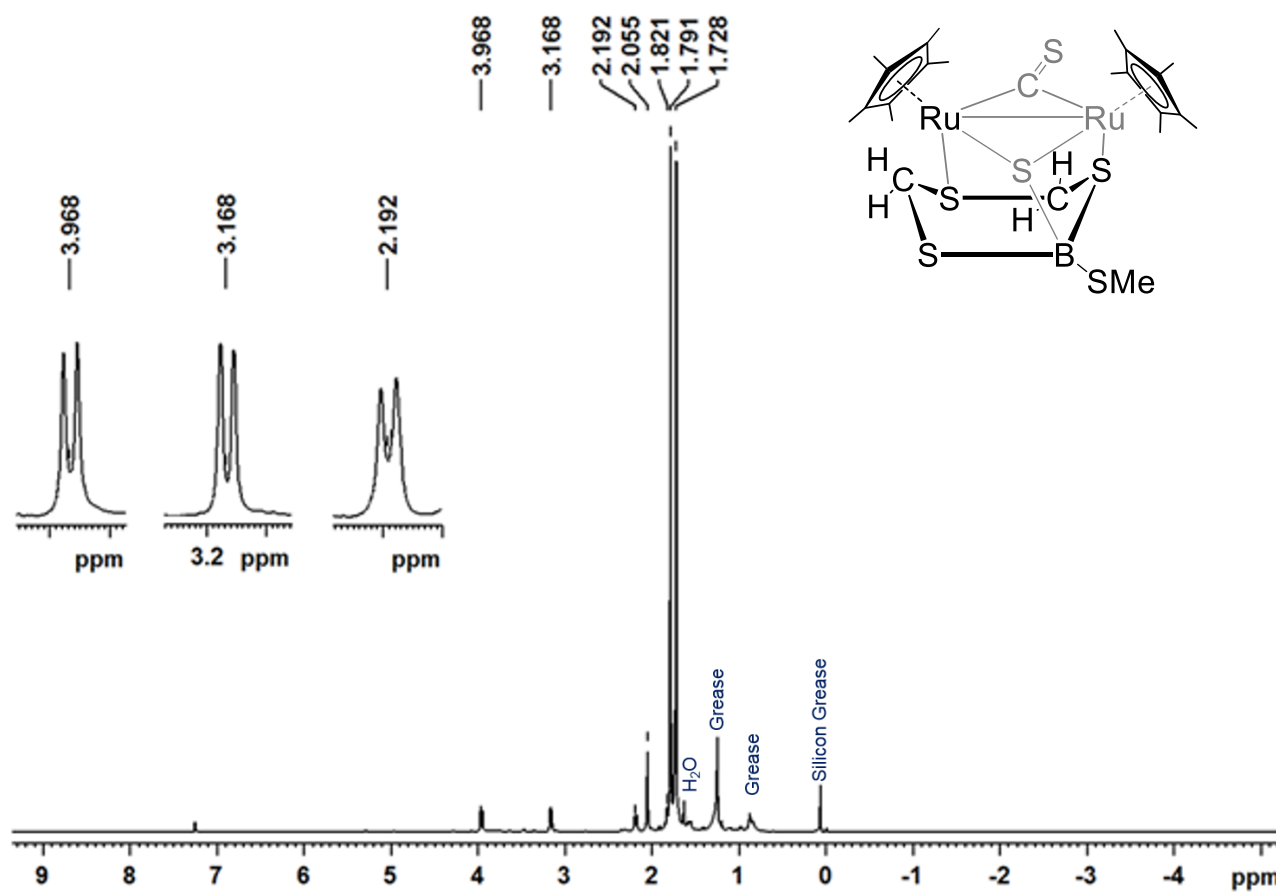

**Figure S13.**  $^1\text{H}$  NMR spectrum of compound **3** in  $\text{CDCl}_3$ .

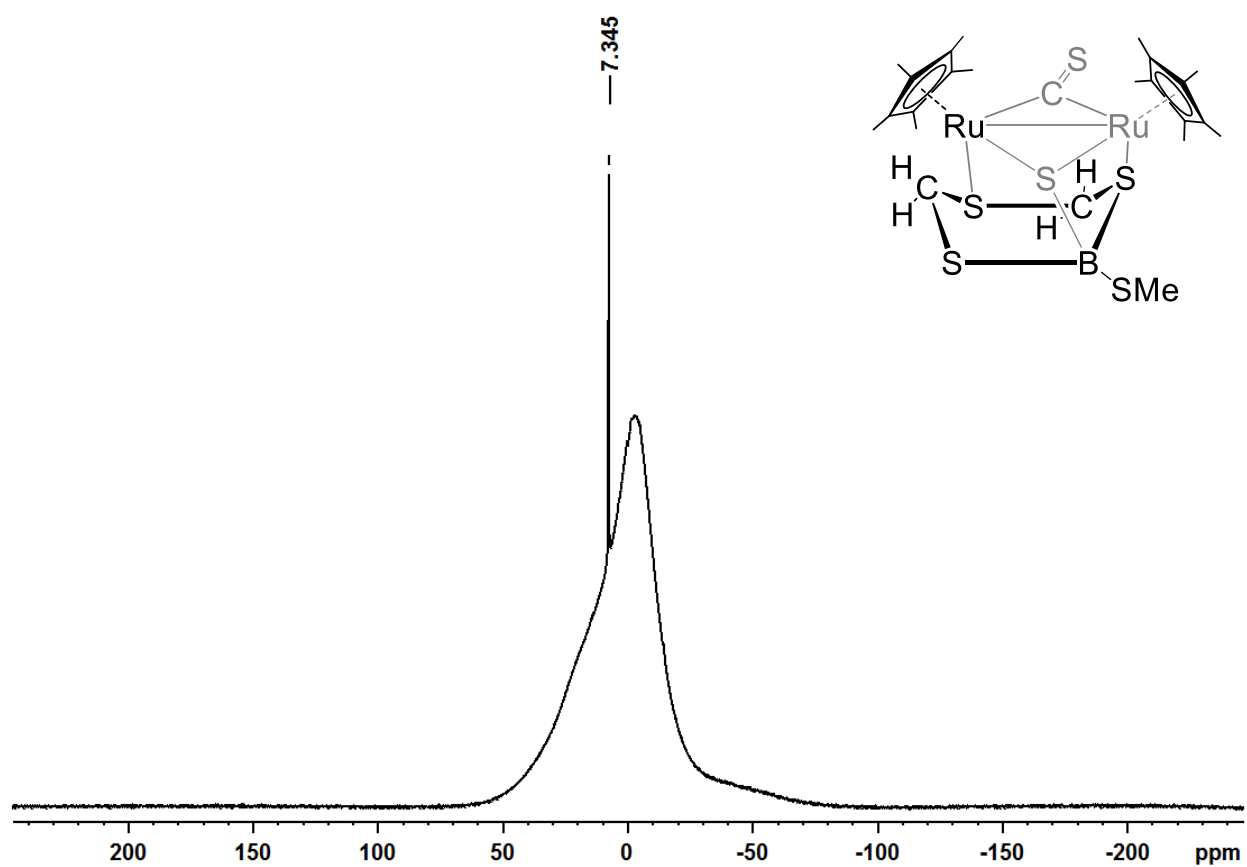

**Figure S14.**  $^{11}\text{B}\{^1\text{H}\}$  NMR spectrum of compound **3** in  $\text{CDCl}_3$ .

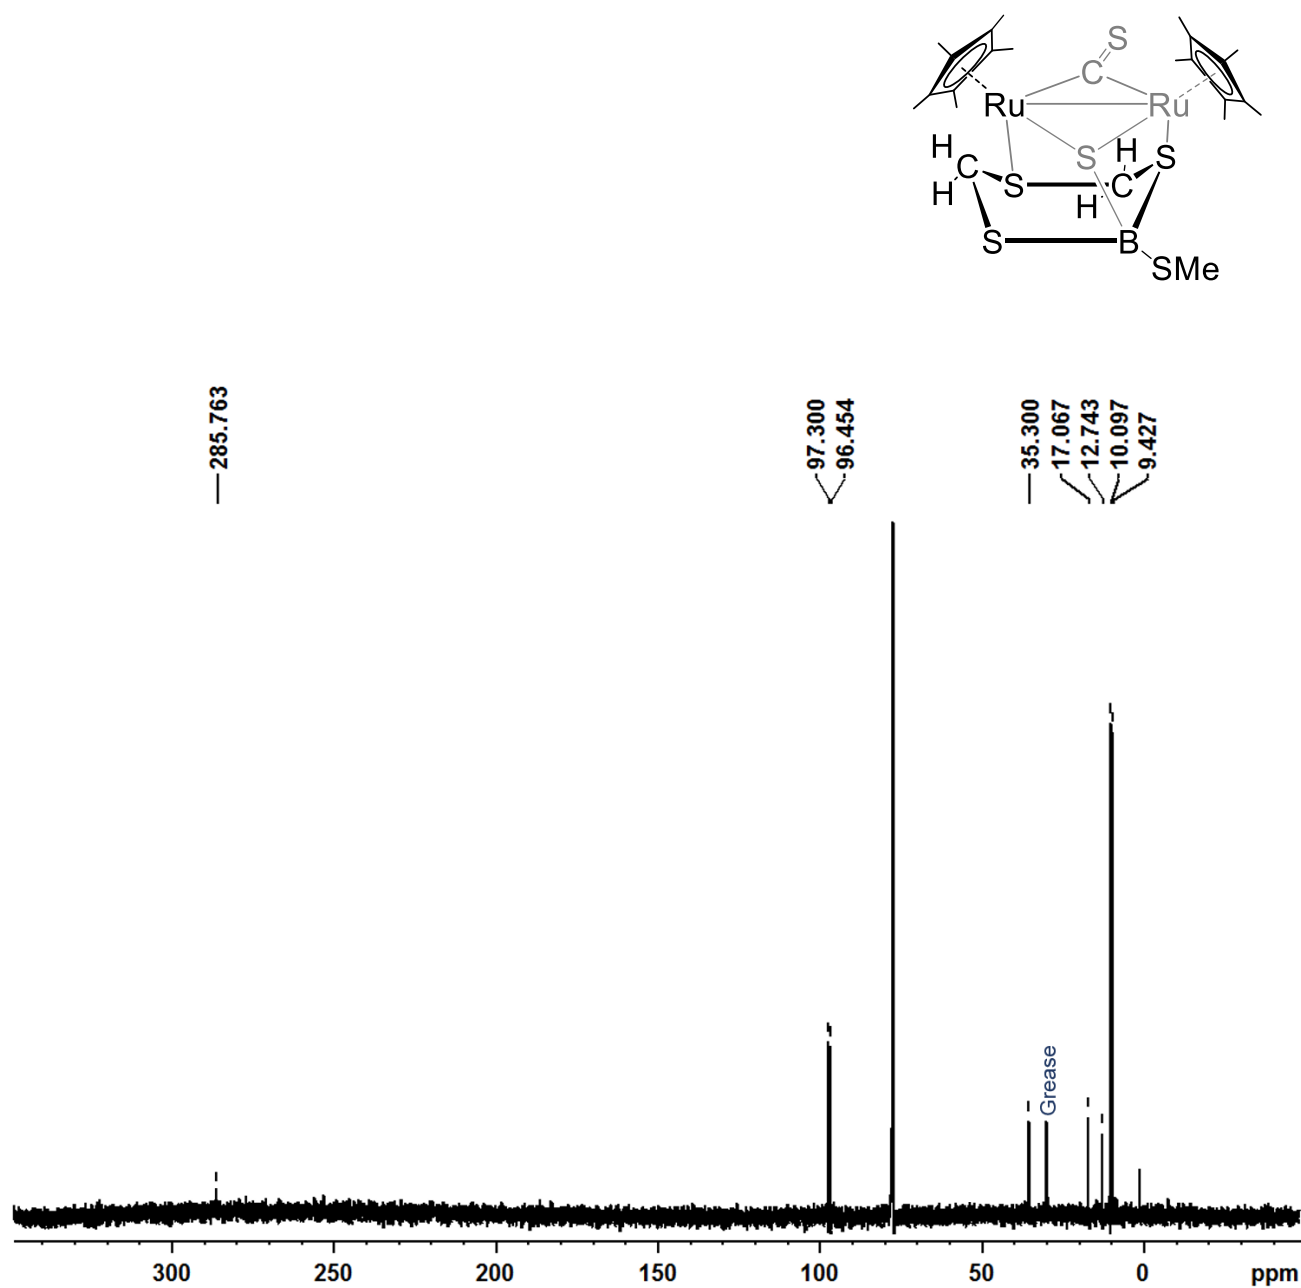

**Figure S15.**  $^{13}\text{C}$   $\{^1\text{H}\}$  NMR spectrum of compound **3** in  $\text{CDCl}_3$ .



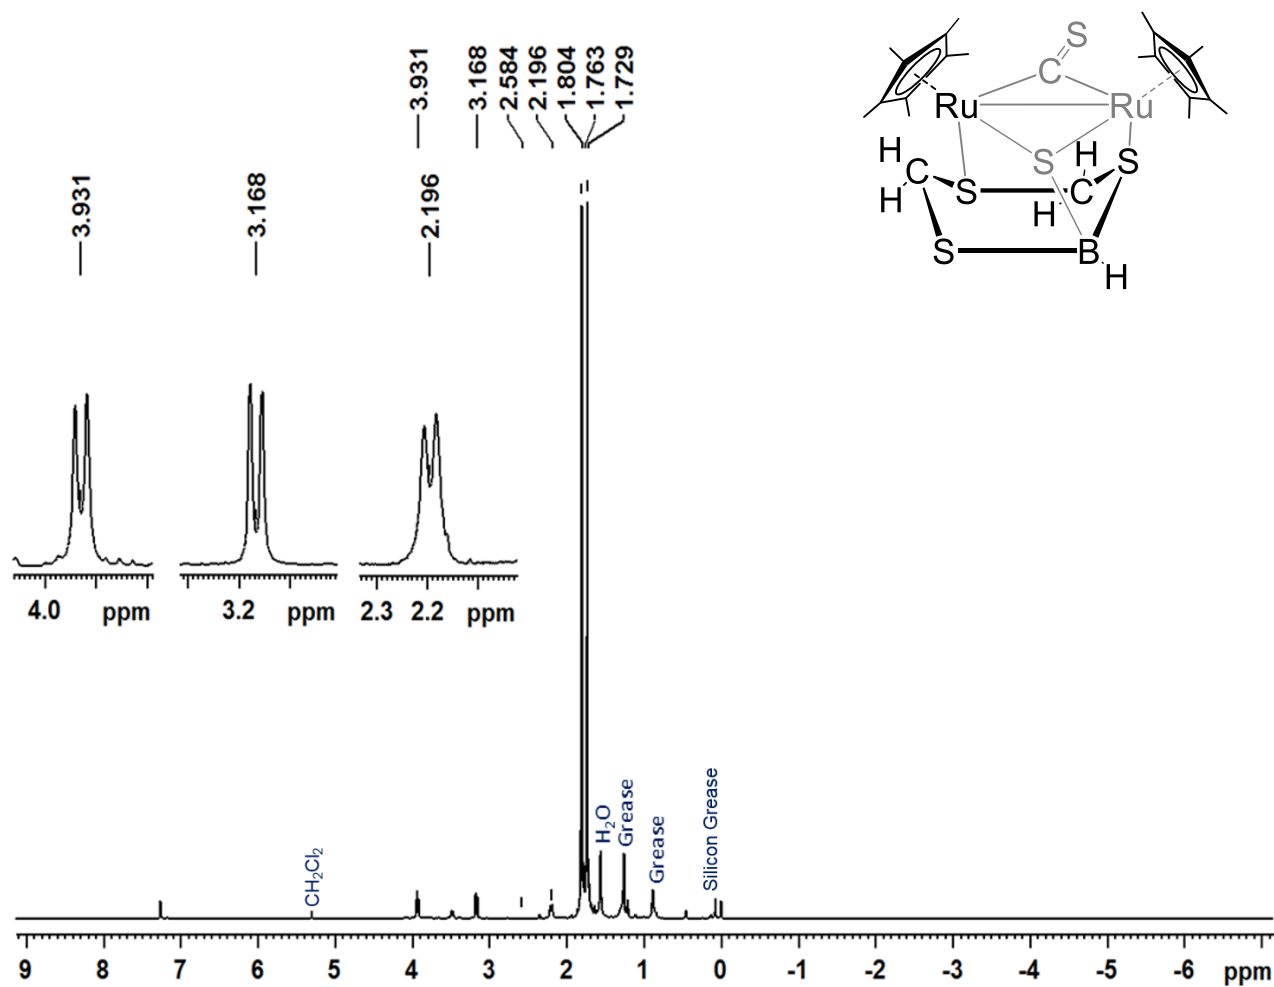

**Figure S16.**  $^1\text{H}$  NMR spectrum of compound **4** in  $\text{CDCl}_3$ .

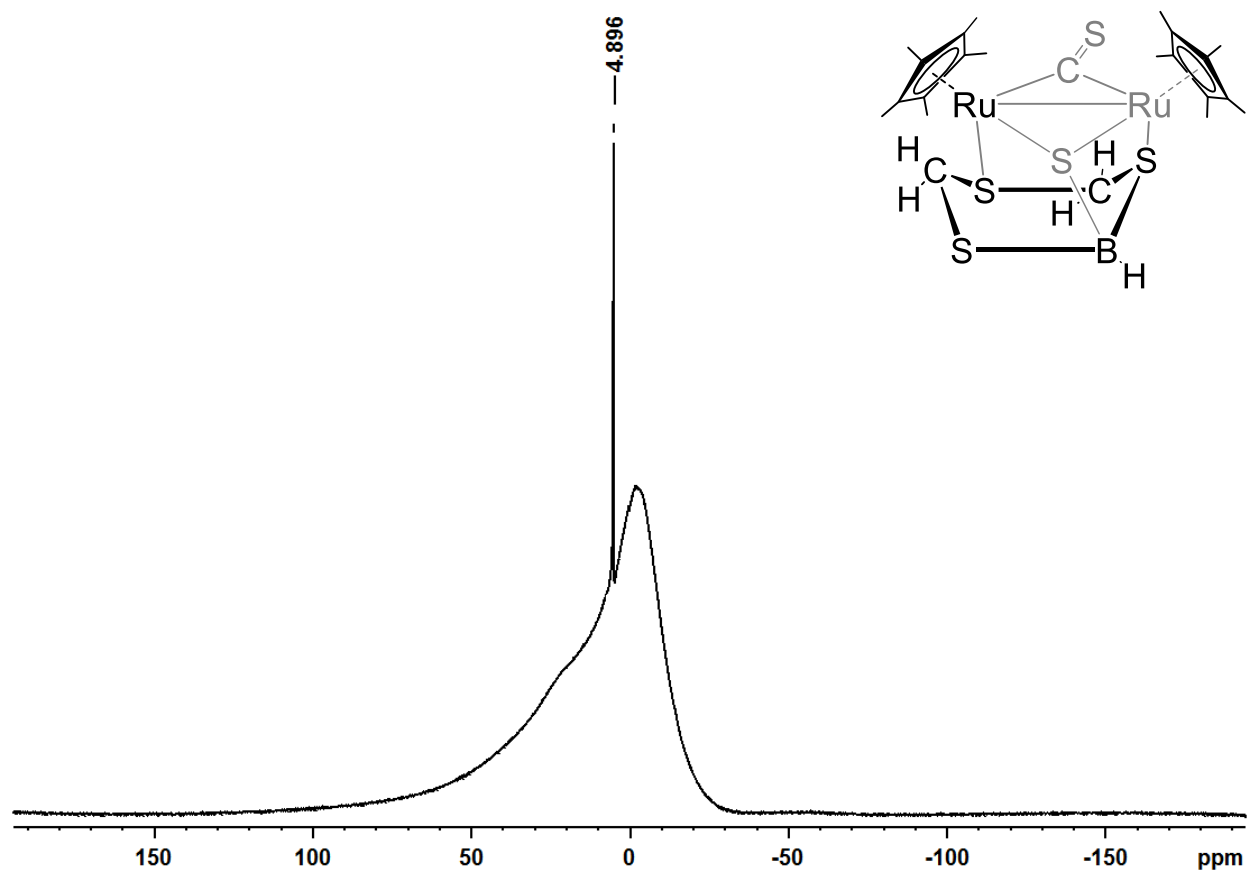

**Figure S17.**  $^{11}\text{B}\{^1\text{H}\}$  NMR spectrum of compound **4** in  $\text{CDCl}_3$ .

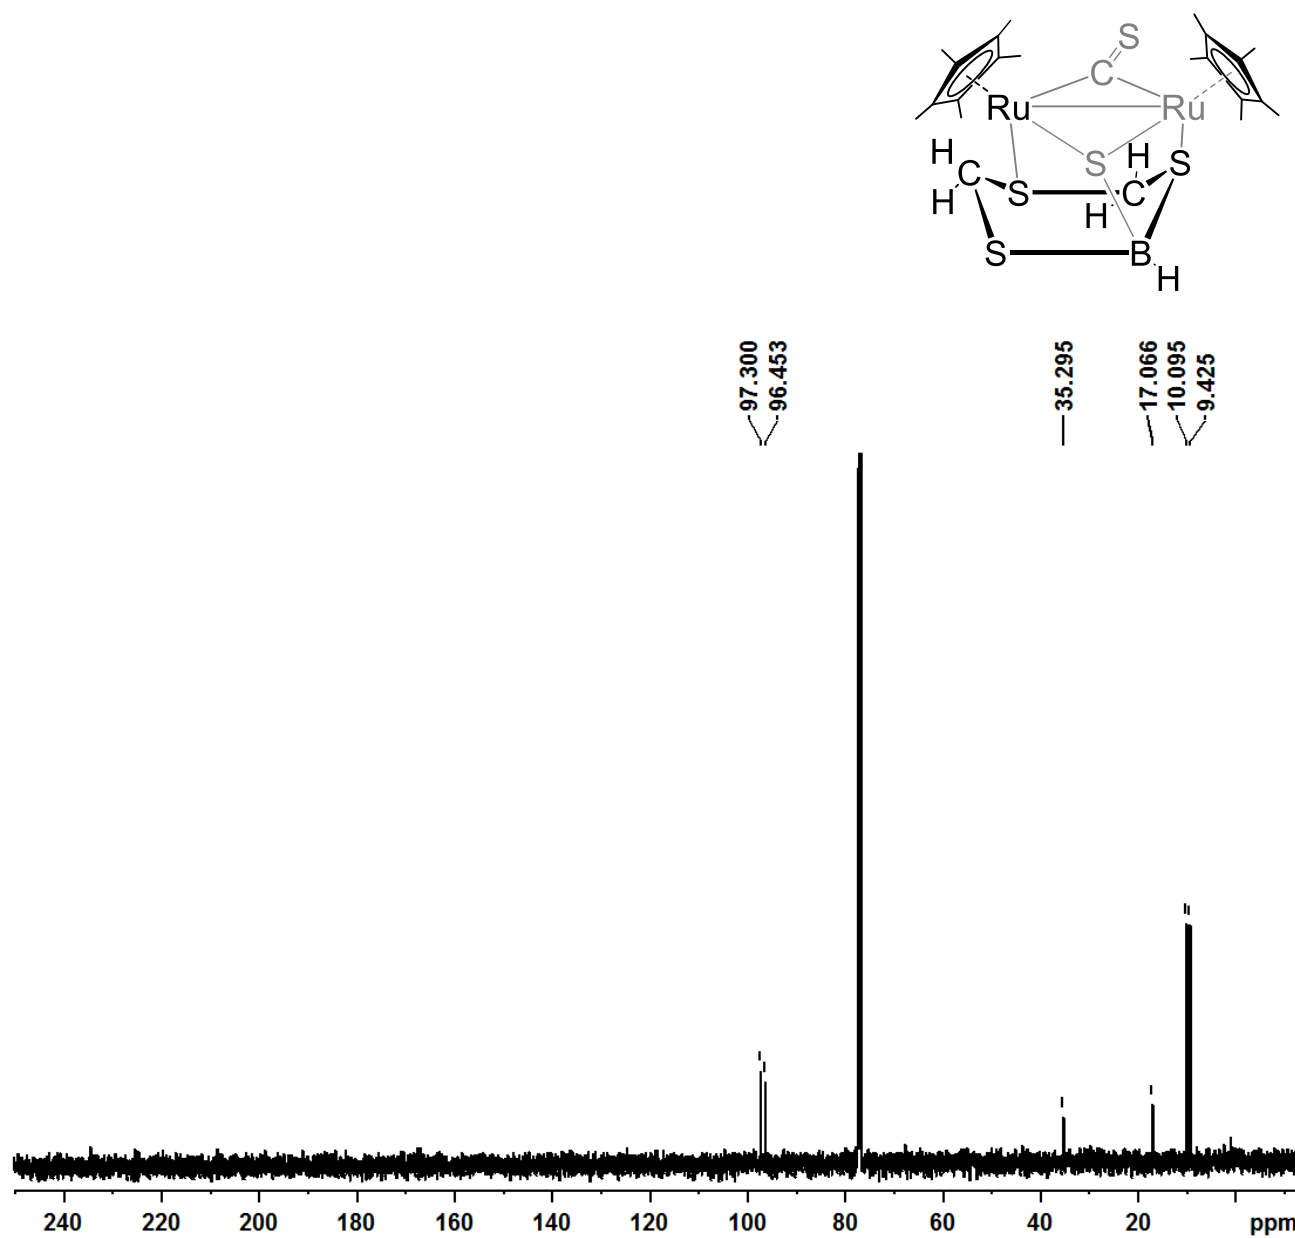

**Figure S18.**  $^{13}\text{C}\{^1\text{H}\}$  NMR spectrum of compound **4** in  $\text{CDCl}_3$ .

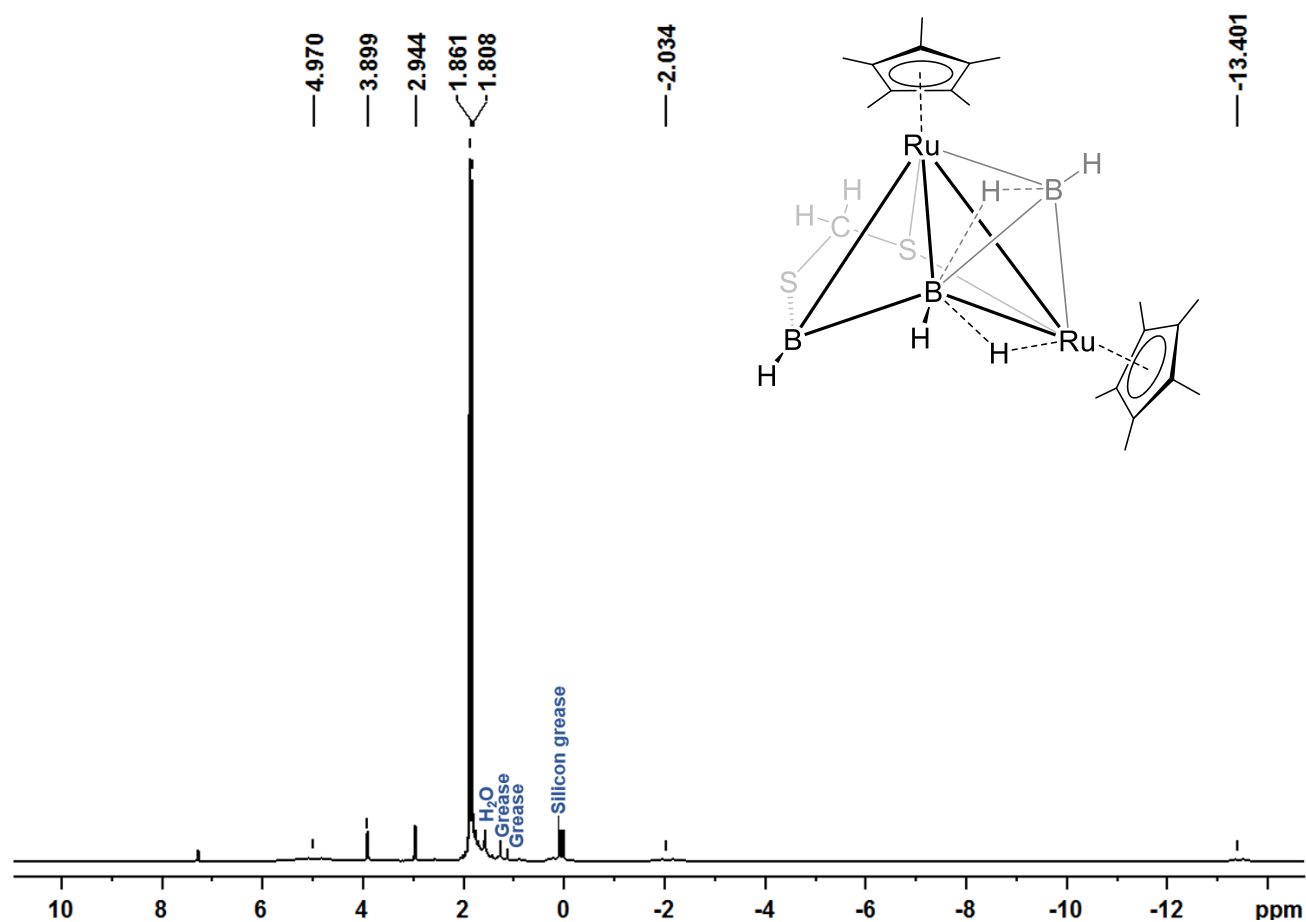

**Figure S19.**  $^1\text{H}$  NMR spectrum of compound **5** in  $\text{CDCl}_3$ .

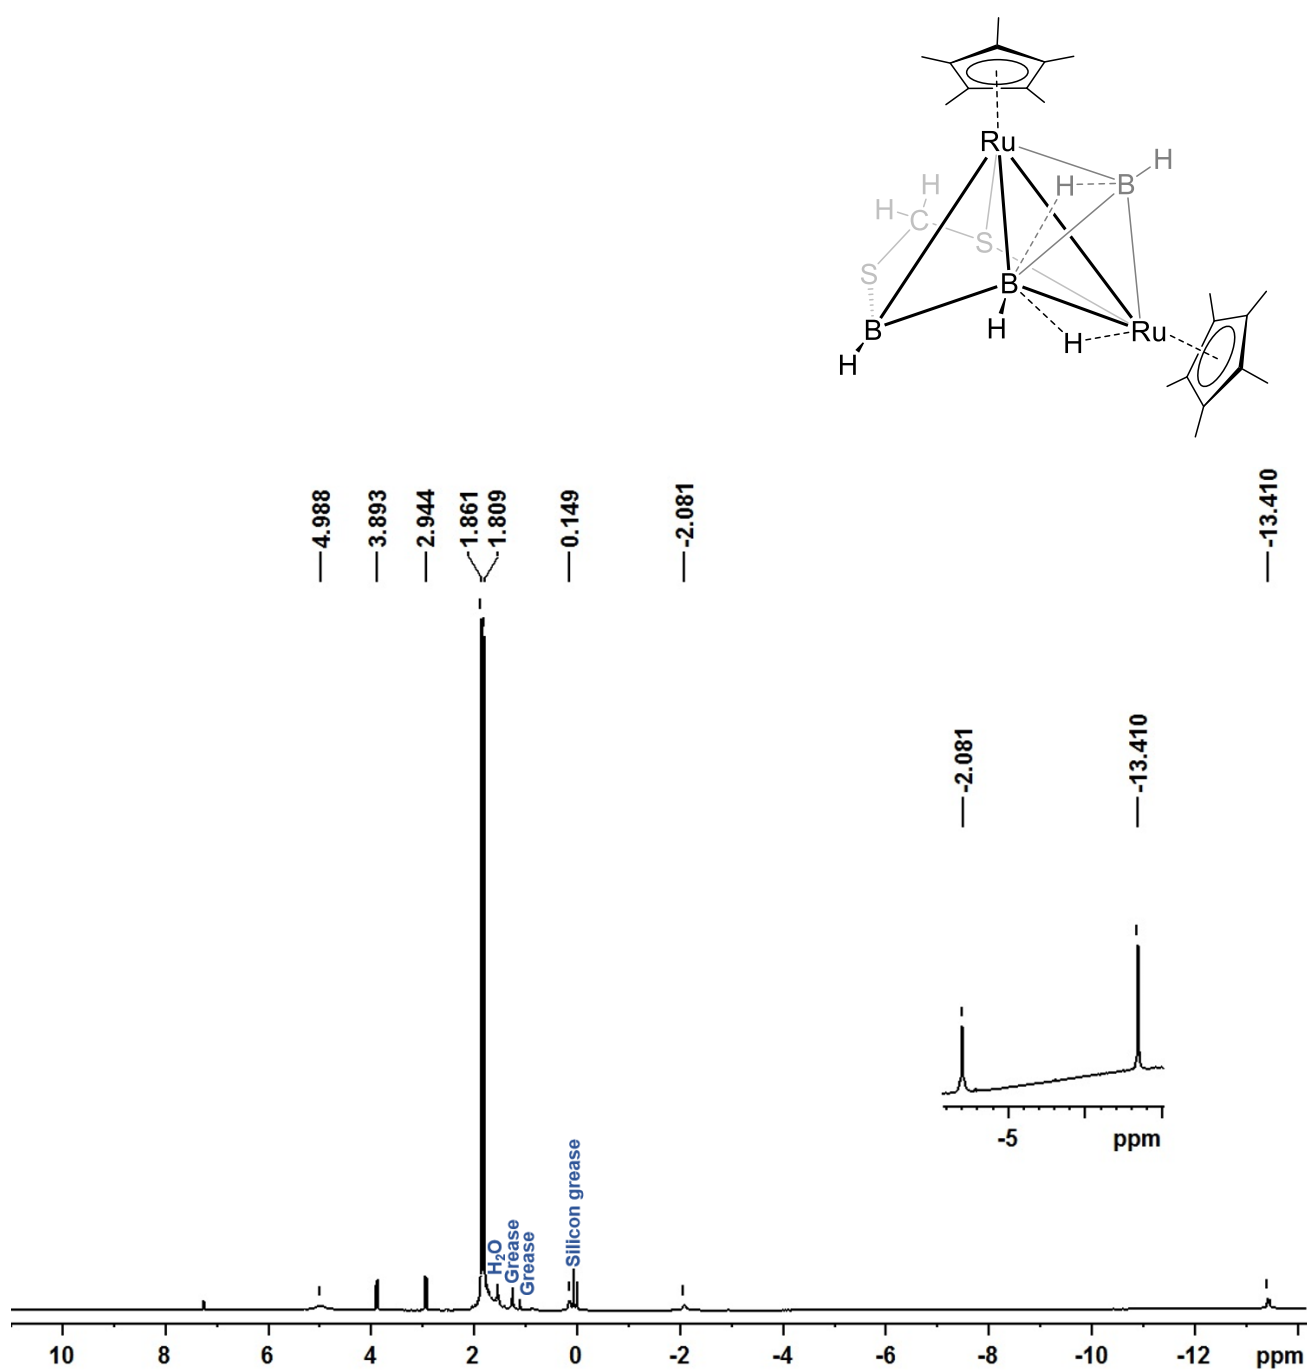

**Figure S20.**  $^1\text{H}\{^{11}\text{B}\}$  NMR spectrum of compound **5** in  $\text{CDCl}_3$ .

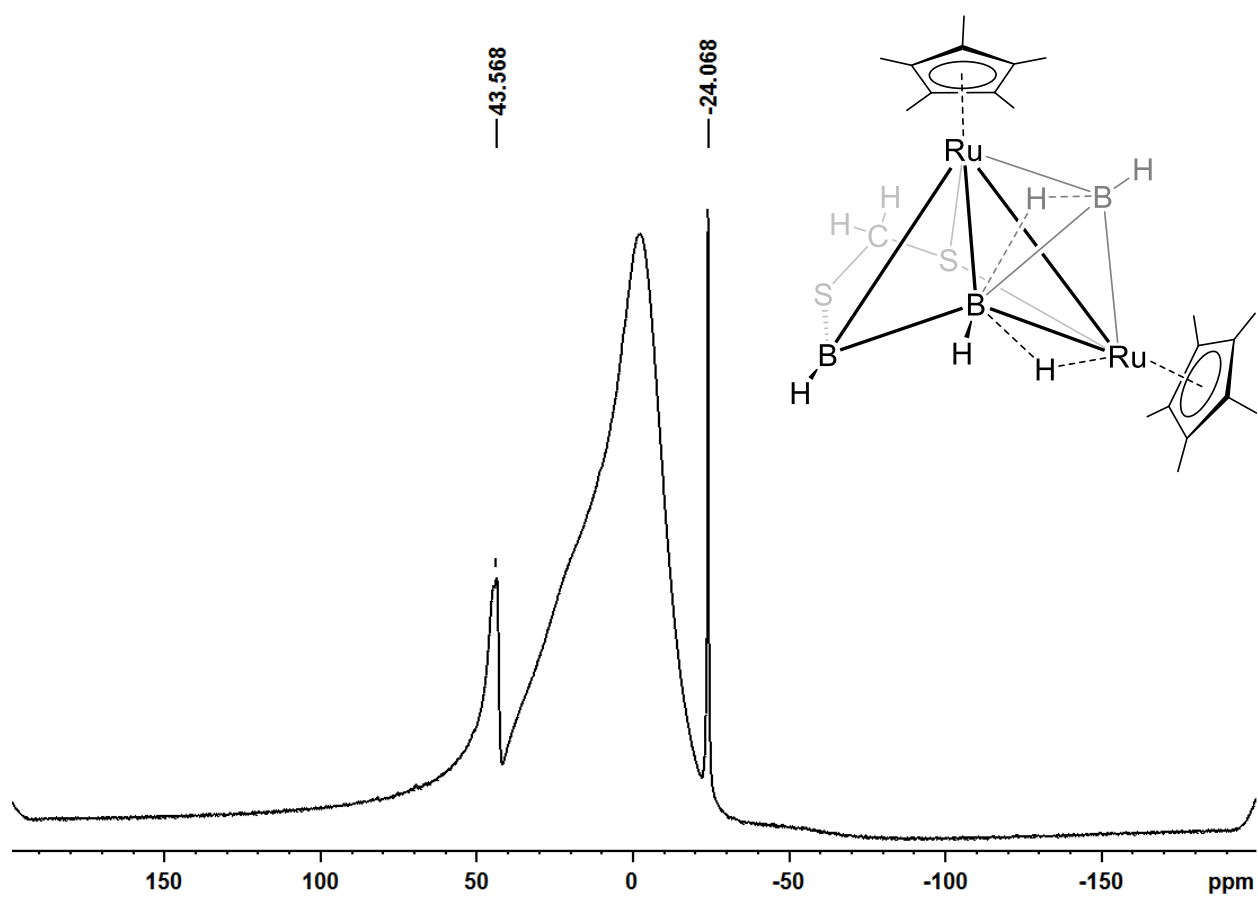

**Figure S21.**  $^{11}\text{B}\{^1\text{H}\}$  spectrum of compound **5** in  $\text{CDCl}_3$ .

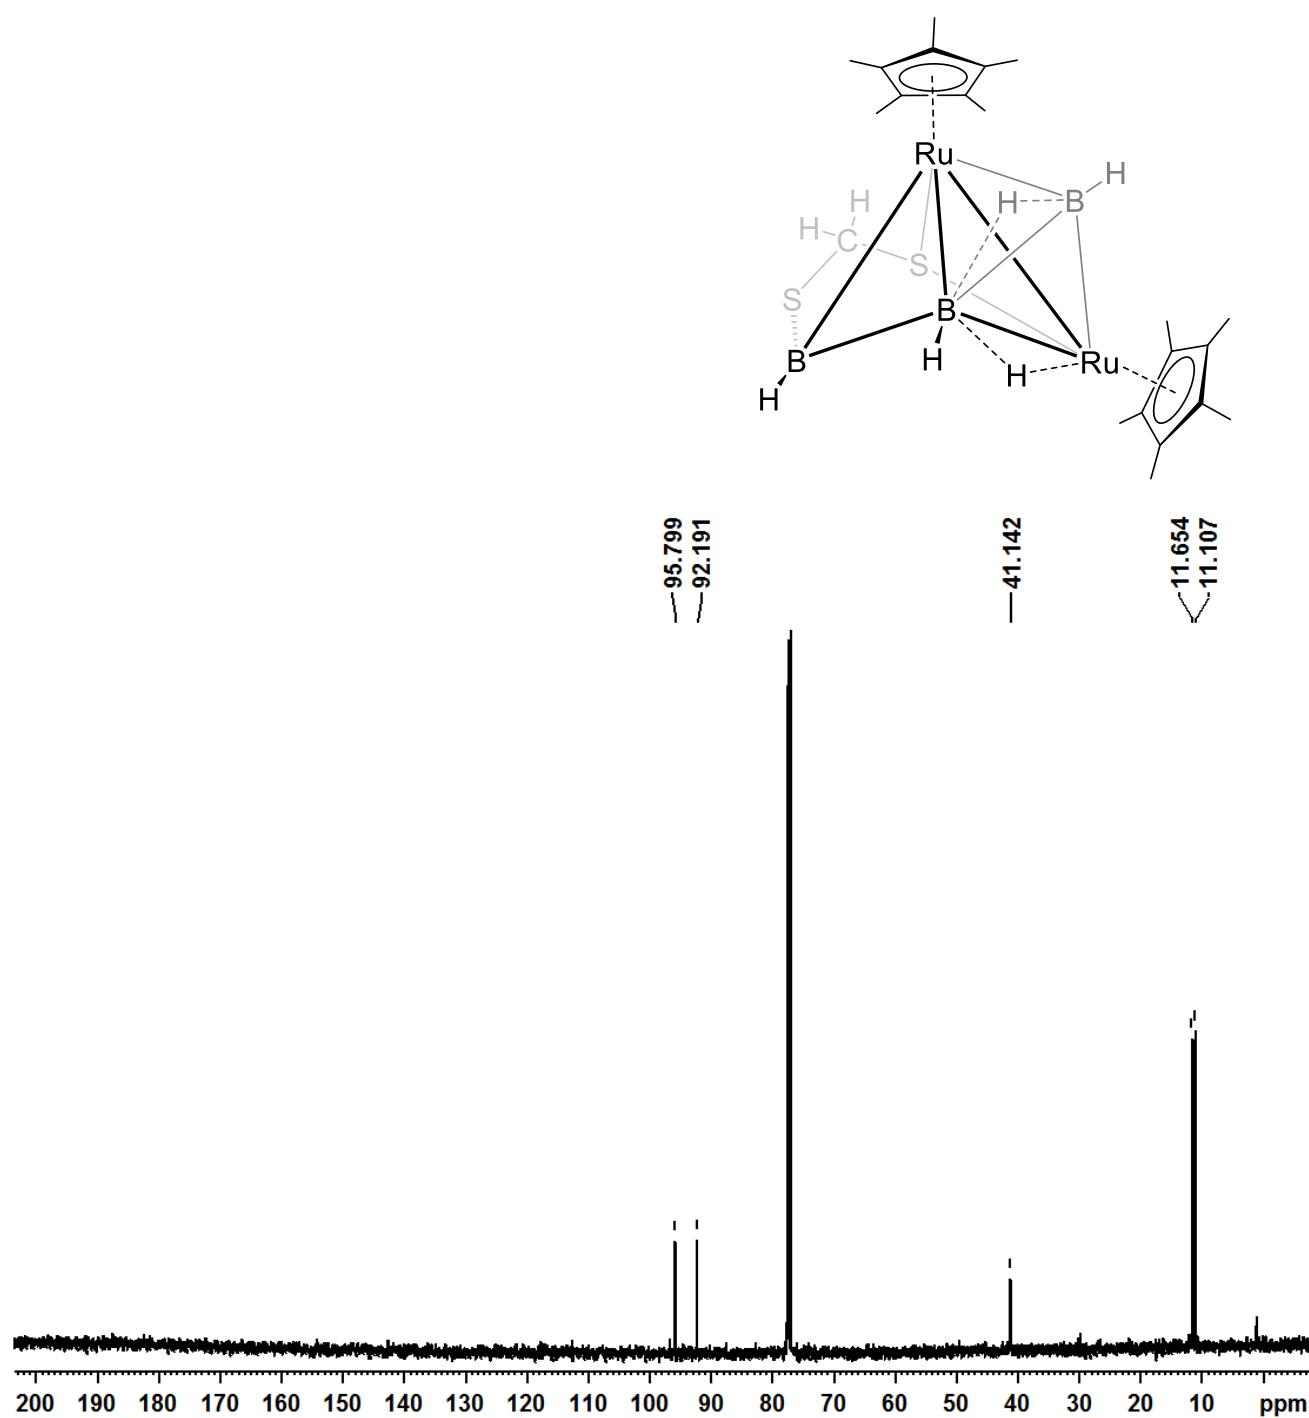

**Figure S22.**  $^{13}\text{C}\{^1\text{H}\}$  NMR spectrum of compound **5** in  $\text{CDCl}_3$ .
